# Supplementary material for: A coarse-grained NADH redox model enables inference of subcellular metabolic fluxes from fluorescence lifetime imaging
Source: eLife. 2021 Nov 22;10:e73808. doi: 10.7554/eLife.73808 (PMC8935353; doi:10.7554/eLife.73808)
Supplement: Figure 2—source data 1. [file elife-73808-fig2-data1.xlsx]

## Sheet: intensity
oxamate	rot	oligo	fccp
240046	245709	332872	284302
287157	386620	291762	260580
283269	416812	371721	302592
227411	306754	296268	235032
278548	357457	263114	246830
268590	360939	368487	269975
252940	350201	326823	243720
282822	334674	343915	250963
245197	346687	372277	248393
263156	386656	395270	247764
298409	356809	349720	275774
301281	323104	409304	255536
276621	257445	299716	292454
275586	343946	302198	253217
292537	274770	321788	286678
311716	298780	324773	262566
296027	248070	308522	266316
314178	301383	331388	298113
291030	303214	343364	274603
312047	373612	362853	282745
308194	321579	391905	262943
286727	299408	321013	281204
281621	263165	345829	220700
312121	309459	310467	230674
303568	356988	332400	243839
370203	295910	350856	232895
310462	289514	301630	237551
280304	362221	330637	225248
		267611	231431
		272778	233130
		277127	226188
		313322
		285251
		276779
		298053
		221918
		223787

## Sheet: bound ratio
oxamate	rot	oligo	fccp
0.60541	0.360894	0.34437	0.605446
0.602747	0.336454	0.367555	0.608985
0.591591	0.32151	0.360665	0.570321
0.599315	0.338573	0.384178	0.732842
0.562216	0.318329	0.345594	0.648811
0.623561	0.345868	0.380829	0.665149
0.579186	0.378219	0.330699	0.648693
0.543256	0.32572	0.334593	0.698443
0.575208	0.320593	0.359211	0.606676
0.610206	0.321757	0.344935	0.792436
0.600242	0.304387	0.333459	0.635996
0.557699	0.34508	0.349721	0.593204
0.578823	0.364271	0.371068	0.568466
0.529806	0.359055	0.469106	0.617628
0.569004	0.398259	0.350838	0.584783
0.42891	0.356344	0.361168	0.702572
0.374848	0.460895	0.396085	0.611937
0.455598	0.386069	0.384508	0.671374
0.53047	0.357606	0.339005	0.621476
0.557726	0.33148	0.370386	0.661553
0.567863	0.380768	0.354242	0.638381
0.534282	0.358657	0.369528	0.818446
0.65692	0.480317	0.346831	0.727088
0.617175	0.335758	0.362721	0.988425
0.618711	0.324098	0.329349	1.17375
0.537229	0.326201	0.343207	0.688809
0.51803	0.373622	0.33157	0.69745
0.586	0.333129	0.394105	0.707247
		0.362087	0.598933
		0.354927	0.575446
		0.322058	0.679172
		0.309672
		0.343415
		0.3437
		0.32421
		0.382001
		0.351987

## Sheet: short lifetime
oxamate	rot	oligo	fccp
0.432748	0.41026	0.417417	0.387055
0.436107	0.414612	0.39684	0.36146
0.391975	0.396428	0.399641	0.36573
0.447344	0.401034	0.418868	0.403041
0.414696	0.382316	0.378379	0.383684
0.391393	0.403569	0.423002	0.395899
0.469701	0.412718	0.401555	0.399626
0.420141	0.394013	0.414756	0.410386
0.379688	0.404341	0.376248	0.408225
0.419791	0.401773	0.40879	0.364742
0.408587	0.387364	0.382612	0.396594
0.396645	0.405942	0.403166	0.378987
0.434653	0.409008	0.387029	0.45234
0.394261	0.430242	0.395323	0.422013
0.360348	0.418667	0.39511	0.384229
0.419182	0.411373	0.419962	0.455718
0.409616	0.424075	0.38271	0.458378
0.416469	0.435298	0.395378	0.396168
0.390727	0.454605	0.416296	0.44496
0.423398	0.415231	0.426057	0.380247
0.399736	0.422854	0.406153	0.454582
0.444164	0.42545	0.393158	0.427815
0.401799	0.408438	0.440344	0.372652
0.399629	0.398848	0.387996	0.415035
0.377201	0.414705	0.422435	0.395974
0.405821	0.39909	0.392238	0.369207
0.405642	0.413356	0.410832	0.386464
0.397203	0.405997	0.401674	0.445849
		0.407143	0.31007
		0.398062	0.348275
		0.391663	0.373899
		0.364146
		0.380486
		0.386491
		0.360516
		0.36419
		0.386529

## Sheet: long lifetime
oxamate	rot	oligo	fccp
2.10116	2.42256	2.45894	2.01808
2.07895	2.49551	2.37263	1.99499
2.06362	2.37403	2.36122	2.01895
2.11622	2.47104	2.4054	1.94563
2.0764	2.40546	2.31318	2.0168
2.0536	2.43927	2.4282	2.06176
2.09703	2.43328	2.4015	1.99393
2.13418	2.43027	2.40071	1.93764
2.03573	2.44392	2.33617	2.05889
2.08686	2.4256	2.41781	1.8451
2.02337	2.45376	2.34669	1.96405
2.13034	2.37458	2.37162	1.99823
2.13449	2.39204	2.36145	2.10626
2.12604	2.439	2.22179	2.04061
1.99303	2.33909	2.35468	1.99826
2.28744	2.46349	2.36321	1.99266
2.36722	2.33547	2.25074	2.0435
2.24475	2.44281	2.31259	1.95782
2.09615	2.45066	2.39487	2.07744
2.09462	2.53406	2.42079	1.96108
2.06643	2.34831	2.32563	2.07352
2.23913	2.43943	2.36329	1.9187
2.03791	2.40708	2.45289	1.96845
2.00208	2.39958	2.29659	1.81202
2.01091	2.41319	2.42039	1.79408
2.10745	2.39876	2.29155	1.9395
2.11379	2.3067	2.45176	1.94944
2.02475	2.34823	2.33302	1.99147
		2.41363	1.92402
		2.40733	2.01116
		2.37567	1.9669
		2.37309
		2.31995
		2.35663
		2.25798
		2.23068
		2.29774

## Sheet: nadhf
oxamate	rot	oligo	fccp
32.1893	44.0015	60.0431	40.5218
38.87	70.3401	52.4269	38.0097
40.0352	81.9562	67.7457	45.5948
30.4204	56.5117	50.6111	29.4518
40.158	71.0807	50.917	33.3693
36.7059	65.995	62.3478	35.0377
35.2834	60.0398	62.5036	32.8469
41.0235	64.4048	64.4201	32.5819
36.1787	66.6531	69.8183	34.179
35.5008	74.6173	72.7595	30.9293
41.9606	71.7711	68.5334	38.1967
43.4072	60.1738	75.9561	37.2834
37.7806	45.8965	54.0734	40.4111
41.39	60.179	48.1913	34.3562
44.8168	46.4088	60.093	42.1009
50.7281	52.924	58.1415	32.3418
52.1022	38.9474	55.2857	35.5566
49.7899	50.1332	58.8083	39.7674
44.2892	52.0083	63.7314	36.0551
44.747	67.8797	62.555	38.4781
44.7953	55.6715	72.6325	33.7435
39.8798	52.4957	57.7607	32.1017
37.0339	38.6716	61.073	27.9308
43.6394	58.5718	57.9929	24.6209
42.7981	68.1663	62.1673	22.891
55.0439	57.2447	67.8741	31.495
47.1751	51.8423	56.2056	31.2327
40.4969	69.5393	57.2568	27.8324
		47.6635	36.1682
		49.684	35.4984
		54.6685	30.2431
		65.0271
		55.2628
		52.7555
		62.205
		42.0998
		42.7355

## Sheet: nadhb
oxamate	rot	oligo	fccp
19.4877	15.8799	20.677	24.5338
23.4288	23.6662	19.2697	23.1473
23.6845	26.3498	24.4335	26.0037
18.2314	19.1333	19.4437	21.5835
22.5775	22.6271	17.5966	21.6503
22.8884	22.8255	23.7438	23.3053
20.4357	22.7082	20.6699	21.3075
22.2863	20.9779	21.5545	22.7566
20.8103	21.3685	25.0795	20.7356
21.6628	24.0086	25.0973	24.5095
25.1865	21.8462	22.8531	24.293
24.2082	20.7648	26.5635	22.1167
21.8683	16.7188	20.0649	22.9723
21.9287	21.6076	22.6068	21.2194
25.5009	18.4827	21.0829	24.6199
21.7578	18.8592	20.9988	22.7224
19.5304	17.9506	21.8979	21.7584
22.6842	19.3549	22.6123	26.6988
23.4941	18.5984	21.6053	22.4074
24.9566	22.5008	23.1695	25.4553
25.4376	21.1979	25.7295	21.5412
21.307	18.828	21.3442	26.2735
24.3283	18.5746	21.182	20.3082
26.9332	19.6659	21.0352	24.3359
26.4797	22.0926	20.4747	26.8684
29.5712	18.6733	23.2949	21.694
24.4381	19.3694	18.6361	21.7833
23.7312	23.1656	22.5652	19.6844
		17.2583	21.6623
		17.6342	20.4274
		17.6064	20.5402
		20.1371
		18.9781
		18.1321
		20.1675
		16.0822
		15.0423
