# Supplementary material for: A coarse-grained NADH redox model enables inference of subcellular metabolic fluxes from fluorescence lifetime imaging
Source: eLife. 2021 Nov 22;10:e73808. doi: 10.7554/eLife.73808 (PMC8935353; doi:10.7554/eLife.73808)
Supplement: Figure 5—figure supplement 1—source data 1. [file elife-73808-fig5-figsupp1-data1.xlsx]

## Sheet: NADH intensity
AKSOM	oxamate	rotenone	oligomycin	FCCP
333531	280738	245709	332872	284302
283665	266215	386620	291762	260580
299694	277368	416812	371721	302592
254847	270542	306754	296268	235032
278709	277101	357457	263114	246830
258525	280912	360939	368487	269975
332896	280151	350201	326823	243720
364933	265212	334674	343915	250963
310584	244569	346687	372277	248393
346191	264905	386656	395270	247764
372244	221855	356809	349720	275774
367317	221126	323104	409304	255536
375716	219221	257445	299716	292454
428529	229264	343946	302198	253217
319644	197838	274770	321788	286678
296735	192649	298780	324773	262566
262471	205117	248070	308522	266316
294936	237264	301383	331388	298113
183192	193361	303214	343364	274603
164287	226145	373612	362853	282745
205476		321579	391905	262943
279834		299408	321013	281204
304069		263165	345829	220700
233511		309459	310467	230674
305268		356988	332400	243839
251552		295910	350856	232895
278838		289514	301630	237551
306741		362221	330637	225248
293141			267611	231431
293581			272778	233130
307243			277127	226188
302671			313322
322614			285251
305345			276779
291744			298053
296374			221918
411620			223787
409148
444209
428169
352479
325147
293114
260628
336482
350926
345278
336150
566887
580300
554246
547360
415082
433415
420079
415378
294853
320163
274771
293255
318811
339280
334465
309636
507713
458776
431731
434487

## Sheet: NADH bound ratio
AKSOM	oxamate	rotenone	oligomycin	FCCP
0.584732	0.582049	0.360894	0.34437	0.605446
0.810263	0.616101	0.336454	0.367555	0.608985
0.629948	0.741087	0.32151	0.360665	0.570321
0.611042	0.821377	0.338573	0.384178	0.732842
0.511304	0.61087	0.318329	0.345594	0.648811
0.566206	0.718792	0.345868	0.380829	0.665149
0.701165	0.69922	0.378219	0.330699	0.648693
0.662987	0.606175	0.32572	0.334593	0.698443
0.650309	0.67836	0.320593	0.359211	0.606676
0.62627	0.540828	0.321757	0.344935	0.792436
0.463243	0.603322	0.304387	0.333459	0.635996
0.534959	0.615205	0.34508	0.349721	0.593204
0.551523	0.662631	0.364271	0.371068	0.568466
0.557563	0.632514	0.359055	0.469106	0.617628
0.60966	0.603324	0.398259	0.350838	0.584783
0.581277	0.597785	0.356344	0.361168	0.702572
0.69687	0.620002	0.460895	0.396085	0.611937
0.576095	0.572007	0.386069	0.384508	0.671374
0.609879	0.573072	0.357606	0.339005	0.621476
0.671136	0.57101	0.33148	0.370386	0.661553
0.577148		0.380768	0.354242	0.638381
0.611768		0.358657	0.369528	0.818446
0.536473		0.480317	0.346831	0.727088
0.593303		0.335758	0.362721	0.988425
0.567128		0.324098	0.329349	1.17375
0.632804		0.326201	0.343207	0.688809
0.573166		0.373622	0.33157	0.69745
0.553027		0.333129	0.394105	0.707247
0.536012			0.362087	0.598933
0.528961			0.354927	0.575446
0.617282			0.322058	0.679172
0.58596			0.309672
0.487693			0.343415
0.607261			0.3437
0.535989			0.32421
0.56655			0.382001
0.601641			0.351987
0.561672
0.574553
0.531678
0.589603
0.574585
0.596507
0.572027
0.549305
0.558711
0.511553
0.583029
0.58748
0.549561
0.568355
0.583303
0.567091
0.526447
0.521895
0.55871
0.547206
0.563965
0.590242
0.60292
0.59204
0.54307
0.532097
0.604114
0.55806
0.504323
0.556333
0.54955

## Sheet: NADH long lifetime (ns)
AKSOM	oxamate	rotenone	oligomycin	FCCP
2.16312	2.03031	2.42256	2.45894	2.01808
1.98698	2.04541	2.49551	2.37263	1.99499
2.14046	1.94404	2.37403	2.36122	2.01895
2.13884	1.90928	2.47104	2.4054	1.94563
2.2692	1.9672	2.40546	2.31318	2.0168
2.25752	1.93374	2.43927	2.4282	2.06176
1.996	1.99408	2.43328	2.4015	1.99393
2.01019	2.04446	2.43027	2.40071	1.93764
2.09044	1.99535	2.44392	2.33617	2.05889
2.11141	2.09701	2.4256	2.41781	1.8451
2.30092	2.0796	2.45376	2.34669	1.96405
2.25799	2.01547	2.37458	2.37162	1.99823
2.14561	1.99641	2.39204	2.36145	2.10626
2.22259	2.05097	2.439	2.22179	2.04061
2.13705	2.00744	2.33909	2.35468	1.99826
2.14097	2.09931	2.46349	2.36321	1.99266
2.06027	2.11858	2.33547	2.25074	2.0435
2.21964	2.07737	2.44281	2.31259	1.95782
2.05198	2.10511	2.45066	2.39487	2.07744
1.98579	2.02579	2.53406	2.42079	1.96108
2.12103		2.34831	2.32563	2.07352
2.08042		2.43943	2.36329	1.9187
2.15699		2.40708	2.45289	1.96845
2.09818		2.39958	2.29659	1.81202
2.1451		2.41319	2.42039	1.79408
2.10535		2.39876	2.29155	1.9395
2.15797		2.3067	2.45176	1.94944
2.1477		2.34823	2.33302	1.99147
2.16126			2.41363	1.92402
2.21171			2.40733	2.01116
2.13147			2.37567	1.9669
2.16517			2.37309
2.25866			2.31995
2.11798			2.35663
2.22377			2.25798
2.17169			2.23068
2.09006			2.29774
2.16108
2.11931
2.16719
2.11783
2.0875
2.11425
2.1079
2.18331
2.09281
2.21092
2.14541
2.15285
2.20343
2.18714
2.17205
2.16978
2.21941
2.21185
2.23418
2.16348
2.11589
2.12052
2.10772
2.10096
2.17811
2.10152
2.19808
2.13696
2.2068
2.16093
2.22067

## Sheet: NADH short lifetime (ns)
AKSOM	oxamate	rotenone	oligomycin	FCCP
0.479737	0.349418	0.41026	0.417417	0.387055
0.471496	0.368207	0.414612	0.39684	0.36146
0.495799	0.385704	0.396428	0.399641	0.36573
0.404458	0.38058	0.401034	0.418868	0.403041
0.462223	0.339712	0.382316	0.378379	0.383684
0.463581	0.348865	0.403569	0.423002	0.395899
0.413018	0.404185	0.412718	0.401555	0.399626
0.415294	0.380741	0.394013	0.414756	0.410386
0.448571	0.372807	0.404341	0.376248	0.408225
0.469162	0.380788	0.401773	0.40879	0.364742
0.50572	0.402713	0.387364	0.382612	0.396594
0.51733	0.388672	0.405942	0.403166	0.378987
0.455928	0.384448	0.409008	0.387029	0.45234
0.469895	0.430063	0.430242	0.395323	0.422013
0.512549	0.353709	0.418667	0.39511	0.384229
0.486626	0.414115	0.411373	0.419962	0.455718
0.507486	0.448671	0.424075	0.38271	0.458378
0.56112	0.352297	0.435298	0.395378	0.396168
0.448928	0.375654	0.454605	0.416296	0.44496
0.481802	0.356722	0.415231	0.426057	0.380247
0.509368		0.422854	0.406153	0.454582
0.44626		0.42545	0.393158	0.427815
0.480529		0.408438	0.440344	0.372652
0.467835		0.398848	0.387996	0.415035
0.49958		0.414705	0.422435	0.395974
0.503359		0.39909	0.392238	0.369207
0.529669		0.413356	0.410832	0.386464
0.467608		0.405997	0.401674	0.445849
0.485664			0.407143	0.31007
0.484409			0.398062	0.348275
0.543516			0.391663	0.373899
0.517347			0.364146
0.415845			0.380486
0.529742			0.386491
0.496704			0.360516
0.471972			0.36419
0.465597			0.386529
0.492461
0.465921
0.503404
0.477555
0.470626
0.505775
0.481919
0.474906
0.438546
0.466854
0.484903
0.503445
0.532946
0.517954
0.560835
0.481278
0.51867
0.534395
0.538617
0.502972
0.480951
0.517639
0.499275
0.462385
0.476779
0.480341
0.547507
0.480879
0.490185
0.485601
0.549325

## Sheet: Free NADH (uM)
AKSOM	oxamate	rotenone	oligomycin	FCCP
43.6775	41.8635	44.0015	60.0431	40.5218
31.364	37.3478	70.3401	52.4269	38.0097
37.2167	34.7866	81.9562	67.7457	45.5948
34.0601	32.0858	56.5117	50.6111	29.4518
39.2154	41.0542	71.0807	50.917	33.3693
33.9699	36.9197	65.995	62.3478	35.0377
41.9799	35.6262	60.0398	62.5036	32.8469
47.6956	37.4779	64.4048	64.4201	32.5819
39.3495	32.359	66.6531	69.8183	34.179
44.1399	39.9079	74.6173	72.7595	30.9293
54.0936	30.6144	71.7711	68.5334	38.1967
48.647	31.1438	60.1738	75.9561	37.2834
52.4342	29.4507	45.8965	54.0734	40.4111
57.3806	30.4563	60.179	48.1913	34.3562
40.2542	28.9313	46.4088	60.093	42.1009
39.214	26.5264	52.924	58.1415	32.3418
30.9561	26.6811	38.9474	55.2857	35.5566
36.7514	35.1504	50.1332	58.8083	39.7674
24.7092	27.9579	52.0083	63.7314	36.0551
20.8644	34.1287	67.8797	62.555	38.4781
27.2149		55.6715	72.6325	33.7435
37.2058		52.4957	57.7607	32.1017
42.4383		38.6716	61.073	27.9308
31.3205		58.5718	57.9929	24.6209
40.5952		68.1663	62.1673	22.891
31.3896		57.2447	67.8741	31.495
36.0499		51.8423	56.2056	31.2327
42.386		69.5393	57.2568	27.8324
40.8522			47.6635	36.1682
40.6047			49.684	35.4984
37.9038			54.6685	30.2431
38.7497			65.0271
48.5616			55.2628
38.6489			52.7555
39.4628			62.205
39.7702			42.0998
54.5497			42.7355
54.7194
60.2199
59.0455
46.6038
44.4079
37.8753
35.2934
45.8974
49.8406
49.3821
44.2241
73.1484
75.9136
71.9177
68.4105
55.3849
58.6314
56.7698
53.0415
39.8996
43.6365
35.5087
37.8507
42.6906
46.6681
47.8178
37.742
69.2681
65.3132
58.3907
56.0984

## Sheet: Bound NADH (uM)
AKSOM	oxamate	rotenone	oligomycin	FCCP
25.5141	24.3425	15.8799	20.677	24.5338
25.2071	22.9762	23.6662	19.2697	23.1473
23.3629	25.7003	26.3498	24.4335	26.0037
20.7854	26.0484	19.1333	19.4437	21.5835
20.0463	25.0478	22.6271	17.5966	21.6503
19.1917	26.5189	22.8255	23.7438	23.3053
29.3986	24.8634	22.7082	20.6699	21.3075
31.5833	22.6661	20.9779	21.5545	22.7566
25.5154	21.9338	21.3685	25.0795	20.7356
27.6028	21.5764	24.0086	25.0973	24.5095
25.0511	18.448	21.8462	22.8531	24.293
25.9577	19.1065	20.7648	26.5635	22.1167
28.9636	19.4413	16.7188	20.0649	22.9723
31.9977	19.2027	21.6076	22.6068	21.2194
24.55	17.4082	18.4827	21.0829	24.6199
22.7727	15.7949	18.8592	20.9988	22.7224
21.4989	16.5218	17.9506	21.8979	21.7584
21.0996	20.0987	19.3549	22.6123	26.6988
15.0235	16.005	18.5984	21.6053	22.4074
13.8724	19.4707	22.5008	23.1695	25.4553
15.6212		21.1979	25.7295	21.5412
22.7406		18.828	21.3442	26.2735
22.7434		18.5746	21.182	20.3082
18.5181		19.6659	21.0352	24.3359
23.0099		22.0926	20.4747	26.8684
19.8118		18.6733	23.2949	21.694
20.65		19.3694	18.6361	21.7833
23.3743		23.1656	22.5652	19.6844
21.7882			17.2583	21.6623
21.4109			17.6342	20.4274
23.3022			17.6064	20.5402
22.6651			20.1371
23.6607			18.9781
23.3415			18.1321
21.1367			20.1675
22.5129			16.0822
32.8036			15.0423
30.7194
34.5798
31.3795
27.4679
25.5118
22.567
20.1512
25.2033
27.8176
25.2292
25.7556
42.939
41.7018
40.8171
39.8475
31.3772
30.8432
29.6127
29.6244
21.8221
24.6006
20.9228
22.7837
25.2478
25.3321
25.4014
22.7627
38.6419
32.9255
32.4736
30.7949

## Sheet: Equilibrium NADH long lifetime
AKSOM	oxamate	rotenone	oligomycin	FCCP
2.35366	2.48112	2.69158	2.60558	2.57479
2.36811	2.58914	2.5846	2.50898	2.50552
2.56205	2.47268	2.48077	2.46533	2.46567
2.31843	2.44526	2.71313	2.54219	2.58352
2.42335	2.47489	2.46719	2.44893	2.47873
2.4878	2.4768	2.51923	2.51919	2.53138
2.19901	2.53974	2.55953	2.8267	2.43715
2.20902	2.7031	2.48271	2.60738	2.4163
2.38867	2.48464	2.52809	2.4207	2.512
2.34094	2.55455	2.50222	3.38188	2.50196
2.66579	2.46024	2.53361	2.60686	2.03863
2.56974	2.60396	2.4637	2.45782	2.13882
2.29245	2.61057		2.57109	2.02389
2.39763	2.66062		2.47605
2.26445	2.46337		2.73592
2.49363	2.60914		2.58863
2.47832	2.60371		2.55915
2.5223	2.45719		2.6377
2.41365	2.51936		2.32656
2.43297	2.46874		2.31824
2.68219			2.60409
2.30629
2.382
2.50225
2.4565
2.43479
2.52553
2.41671
2.47562
2.51228
2.5929
2.61973
2.92958
2.77128
2.6458
2.56395
2.37188
2.34332
2.41013
2.43181
2.44993
2.37828
2.48436
2.4348
2.55743
2.41592
2.56
2.4924
2.39502
2.41316
2.47328
2.46738
2.62691
2.51987
2.51867
2.52242
2.43103
2.37076
2.47366
2.40049
2.48849
2.52778
2.53619
2.60842
2.40953
2.48157
2.48864
2.48924

## Sheet: Equilibrium NADH bound ratio
AKSOM	oxamate	rotenone	oligomycin	FCCP
0.365195	0.327899	0.293898	0.27788	0.27511
0.426153	0.36195	0.282395	0.28959	0.261906
0.352692	0.319052	0.267092	0.293108	0.286198
0.438799	0.344361	0.273828	0.346358	0.29655
0.421988	0.329358	0.284918	0.316826	0.317951
0.377895	0.336168	0.325692	0.364472	0.341817
0.465476	0.32817	0.331175	0.285857	0.34632
0.417266	0.294267	0.307794	0.297882	NaN
0.42049	0.348609	0.297493	0.340178	NaN
0.402928	0.318797	0.302781	0.265834	0.273963
0.311279	0.36334	0.28256	0.290616	0.284671
0.362425	0.264767	0.309455	0.332727	0.27254
0.444874	0.321311		0.342013	NaN
0.464422	0.300632		0.313432	NaN
0.396626	0.324005		0.267358	NaN
0.315773	0.318591		0.266242
0.315339	0.332846		0.294989
0.31893	0.348763		0.272957
0.366908	0.351039		0.312116
0.3961	0.353556		0.333786
0.353834			0.303449
0.336015
0.329074
0.343812
0.328839
0.345934
0.336169
0.376534
0.342863
0.317836
0.293832
0.366614
0.365837
0.338282
0.337247
0.342126
0.346188
0.349709
0.319349
0.348391
0.33897
0.343749
0.350187
0.322462
0.305194
0.322919
0.288822
0.325368
0.360375
0.346653
0.332703
0.325873
0.297983
0.341397
0.314507
0.343741
0.34073
0.366298
0.338182
0.34266
0.32815
0.319547
0.279384
0.329981
0.328084
0.294453
0.319202
0.326462
