# Supplementary material for: A coarse-grained NADH redox model enables inference of subcellular metabolic fluxes from fluorescence lifetime imaging
Source: eLife. 2021 Nov 22;10:e73808. doi: 10.7554/eLife.73808 (PMC8935353; doi:10.7554/eLife.73808)
Supplement: Figure 5—source data 1. [file elife-73808-fig5-data1.xlsx]

## Sheet: Predicted Jox (uM per second)
AKSOM	oxamate	fccp	rotenone	oligomycin
52.0556	57.7598	71.7631	13.4541	14.5149
65.4016	51.5298	70.7043	13.9115	19.1524
56.0169	79.7006	69.8449	9.5585	22.2686
31.8484	83.0895	69.291	11.8696	22.3894
19.0145	62.7414	59.4713	6.92137	12.5544
34.7273	76.6887	60.7971	16.4253	27.4865
53.7131	71.7633	62.7728	25.2494	10.9042
63.624	63.4603	70.8613	8.89507	12.1279
49.0937	57.927	57.6584	7.3275	22.4805
53.5183	48.103	83.17	8.68332	17.9396
44.6261	39.8846	70.4065	1.59694	12.4905
45.5651	59.2491	60.0054	14.6632	20.158
30.3579	54.5706	59.6498	15.8844	20.8493
29.0141	54.8734	59.6578	18.8062	43.4392
46.5545	43.8701	65.8477	24.7681	16.6166
56.5215	40.2055	70.958	16.0663	19.3075
64.1174	41.5931	60.8098	29.6294	28.8577
51.3081	42.6	80.7779	22.7036	27.0075
32.5922	33.6994	63.6081	16.1384	13.6482
31.1527	40.289	75.8495	11.5615	24.0169
32.9931		62.6753	24.452	21.406
55.6969		90.9794	16.726	21.824
47.7822		57.6322	36.614	15.6228
42.4214		NaN	11.3518	19.8847
52.5146		NaN	8.50491	9.99101
48.8847		69.4958	7.7896	15.8664
46.3817		69.7952	20.5717	9.7484
40.6116		65.1758	12.3666	28.3791
42.8358		NaN		16.0716
46.5388		NaN		14.7485
66.5566		NaN		6.44155
46.1421				3.39079
32.1248				13.0333
56.4359				12.578
42.5772				8.15798
48.4537				17.2311
75.6493				11.944
62.9651
83.4313
58.7516
63.4103
55.6496
50.6471
47.8164
60.8241
63.7989
59.7104
61.8597
90.1847
83.6216
92.0039
95.6052
80.913
58.9007
63.9149
61.9004
44.7237
46.8259
48.5892
53.4788
61.1584
56.6296
65.6022
56.1677
86.4798
74.4133
75.1681
67.94

## Sheet: Measured OCR (fmol per second)
AKSOM	oxamate	fccp	rotenone	oligomycin
2.7428	2.639	3.6905	0.5461	1.0955
2.6298	2.5724	3.3331	0.5038	1.0701
2.7184				1.0049
2.4205

## Sheet: Measure Jox (uM per second)
AKSOM	oxamate	fccp	rotenone	oligomycin
57.8429	55.6539	77.8289	11.5168	23.1037
55.4598	54.2493	70.2917	10.6248	22.5668
57.3283				21.1932
51.0459
