# Supplementary material for: A coarse-grained NADH redox model enables inference of subcellular metabolic fluxes from fluorescence lifetime imaging
Source: eLife. 2021 Nov 22;10:e73808. doi: 10.7554/eLife.73808 (PMC8935353; doi:10.7554/eLife.73808)
Supplement: Figure 6—figure supplement 1—source data 1. [file elife-73808-fig6-figsupp1-data1.xlsx]

## Sheet: slope (A)
AKSOM	oxamate	rotenone	oligomycin	FCCP
0.211648	0.290972	0.365011	0.267082	0.266202
0.371184	0.440122	0.356863	0.154985	0.268048
0.294313	0.285367	0.0465866	0.18516	0.259583
0.321436	0.295688	0.142402	0.338093	0.311429
0.311053	0.329423	0.143435	0.279991	0.262642
0.284491	0.339477	0.448409	0.274971	0.316521
0.301413	0.303822	0.239045	0.391854	0.295404
0.254427	0.334047	0.254171	0.209104	0.15275
0.28483	0.280318	0.205054	0.361381	0.79941
0.277904	0.334075	0.190992	0.408705	0.317216
0.34823	0.3216	0.199501	0.237501	0.304858
0.337414	0.255925	0.254881	0	0.231307
0.408982	0.358282		0.309547	0.516659
0.470184	0.339836		0.1594	0.476708
0.160756	0.287499		0.426093	0.2798
0.213132	0.356025		0.310901
0.19551	0.370723		0.265226
0.211169	0.35023		0.32403
0.286874	0.326024		0.28801
0.384412	0.382491		0.255419
0.411996			0.488991
0.15319
0.184359
0.245308
0.207149
0.23722
0.265755
0.331638
0.266207
0.230166
0.22854
0.392624
1.10349
0.458628
0.32222
0.279272
0.234941
0.161163
0.176134
0.221725
0.254882
0.248251
0.257216
0.275529
0.25757
0.238803
0.218074
0.241675
0.195654
0.177683
0.210884
0.203889
0.234415
0.284404
0.243923
0.246617
0.214007
0.243348
0.272699
0.230671
0.267982
0.258097
0.206205
0.275713
0.223801
0.187476
0.247988
0.237135

## Sheet: offset (B)
AKSOM	oxamate	rotenone	oligomycin	FCCP
1.77773	1.54102	1.352	1.64708	1.61177
1.49737	1.33273	1.34719	1.94982	1.56312
1.64724	1.56755	2.19155	1.84263	1.57726
1.59019	1.55116	2.01288	1.50412	1.52157
1.63484	1.42307	1.9332	1.51102	1.65203
1.72235	1.46456	1.12557	1.70559	1.57661
1.54408	1.56803	1.81888	1.26645	1.55716
1.59971	1.48676	1.6514	1.81242	1.54885
1.62397	1.58991	1.80023	1.34025	1.04405
1.65245	1.48377	1.84356	1.33887	1.39402
1.54597	1.53228	1.78976	1.70036	1.46471
1.63869	1.59854	1.63959	2.37108	1.67298
1.32514	1.47071		1.58063	1.06824
1.30313	1.51844		1.90727	1.19759
1.79891	1.53864		1.03659	1.55614
1.75054	1.49461		1.31302
1.74993	1.53246		1.55753
1.8168	1.46351		1.43824
1.58098	1.52443		1.36639
1.37029	1.34523		1.54761
1.37242			0.922907
1.81699
1.80121
1.6526
1.77642
1.73515
1.6942
1.53393
1.65236
1.76721
1.74258
1.47594
0.0150627
1.35235
1.61161
1.6727
1.69293
1.86111
1.80026
1.7272
1.67492
1.64057
1.68171
1.59067
1.69797
1.66214
1.78588
1.7268
1.81981
1.87653
1.79401
1.82417
1.74196
1.67044
1.72884
1.78338
1.76717
1.67822
1.64044
1.71877
1.64225
1.69854
1.70295
1.72868
1.72969
1.83357
1.71754
1.77912
