# Supplementary material for: A coarse-grained NADH redox model enables inference of subcellular metabolic fluxes from fluorescence lifetime imaging
Source: eLife. 2021 Nov 22;10:e73808. doi: 10.7554/eLife.73808 (PMC8935353; doi:10.7554/eLife.73808)
Supplement: Figure 6—source data 1. [file elife-73808-fig6-data1.xlsx]

## Sheet: rox from bound ratio (per sec)
AKSOM	oxamate	rotenone	oligomycin	FCCP	1uM O2	2uM O2	3uM O2	4uM O2
1.19182	1.37972	0.363701	0.360954	1.79332	0.182686	0.344158	0.730378	1.08427
2.08524	1.37973	0.293471	0.423253	1.88421	0.206	0.315506	0.573418	0.879157
1.50516	2.29113	0.295423	0.366751	1.54244	0.431776	0.624063	1.23495	1.82131
0.935065	2.5896	0.351481	0.205313	2.36853	0.365258	0.8298	1.29442	1.81356
0.484872	1.52826	0.181385	0.156174	1.79616	0.351798	0.564939	0.781911	0.798467
1.0223	2.07717	0.109527	0.0887951	1.75529	0.581471	0.782964	1.21622	1.39966
1.27949	2.01434	0.25539	0.243435	1.91149	0.648519	0.598809	1.15362	1.33782
1.33396	1.69327	0.097318	0.19929	2.18157	0.480977	0.814132	1.08852	1.2945
1.24763	1.79014	0.125405	0.103327	1.68339	0.428107	0.763366	1.10697	1.13579
1.21247	1.20535	0.103015	0.429422	2.69183	0.27499	0.656513	0.797546	0.812059
0.824978	1.3028	0.118494	0.232584	1.84256	0.689972	1.03798	0.925221	1.65995
0.936646	1.90244	0.193398	0.0922592	1.61025	0.220251	0.427031	1.08004	1.35857
0.578972	1.85295	0.367424	0.339967	1.47595	0.32269	0.715679	1.11669	1.33172
0.505643	1.80171	0.339106	0.872192	1.74285	0.317558	0.530262	1.16257	1.28602
1.15651	1.51635	0.551933	0.230148	1.56454	0.627091	NaN	1.28857	1.54217
1.44136	1.51568	0.32439	0.286223	2.20398	0.201911	NaN	0.902652	0.806209
2.07124	1.5589	0.891969	0.475783	1.71195	0.512895	NaN	1.16827	1.43607
1.39608	1.21194	0.485759	0.412934	2.03462	0.360746	0.563432	0.493907	0.510935
1.31903	1.20536	0.331238	0.165909	1.76374	0.347337	0.435254	0.92584	0.881736
1.49311	1.1805	0.189409	0.336265	1.9813	0.418915	0.495131	0.632329	0.652656
1.21232		0.456982	0.248626	1.85551
1.497		0.336948	0.331608	2.83304
1.12592		0.99741	0.208393	2.0671
1.35443		0.212631	0.294655	NaN
1.29362		0.149334	0.113486	NaN
1.55735		0.160749	0.18872	2.2521
1.2866		0.418185	0.125543	2.24088
0.958138		0.198362	0.465033	2.35992
1.04856			0.10898	NaN
1.14615			0.225266	NaN
1.75593			0.296955	NaN
1.19078			0.235769
0.661527			0.262889
1.46022			0.384046
1.07892			0.0656542
1.21834			0.261748
1.38679			0.263504
1.15069
1.38544
0.995022
1.36063
1.25315
1.33721
1.35482
1.32522
1.28006
1.20915
1.39878
1.2329
1.10154
1.27929
1.39752
1.46092
1.00459
1.12586
1.16702
1.12091
1.07309
1.36837
1.41289
1.4326
1.21345
1.37192
1.4882
1.24848
1.13933
1.28733
1.21109

## Sheet: rox from lifetime (per sec)
AKSOM	oxamate	rotenone	oligomycin	FCCP	1uM O2	2uM O2	3uM O2	4uM O2
1.10729	1.57029	0.432547	0.283384	2.1365	0.31714	0.468699	0.84257	1.19461
2.01155	1.46885	0.131265	0.531251	1.90613	0.286426	0.408697	0.59594	0.918202
1.61325	2.55942	0.873454	0.354284	1.62828	0.580475	0.506137	1.02606	1.64888
0.893425	3.12623	0.605668	0.28574	2.44093	0.512966	1.09163	1.01182	1.38091
0.555608	1.60818	0.203631	0.284702	2.27123	0.405085	0.861392	0.916569	0.864204
0.992091	2.19469	0.108687	0.244616	1.78355	0.500079	0.614092	1.15522	1.44111
1.21435	2.27131	0.367639	0.529025	2.11503	0.885103	0.523636	1.46338	1.46266
1.22349	1.84571	0.119054	0.514836	2.97906	0.585303	0.876546	1.55906	1.56378
1.49197	2.13023	0.216888	0.155834	1.60035	0.658969	0.831778	1.62329	1.2985
1.1674	1.28004	0.217022	0.998344	4.20893	0.327602	0.718544	0.874876	0.88986
0.846967	1.37711	0.189695	0.59414	2.38756	0.793153	1.26034	0.917551	3.29634
1.00187	2.17811	0.213563	0	2.11959	0.276908	0.560545	1.24469	1.56631
0.454067	2.09205	0.360458	0.546021	1.2946	0.307149	0.650546	0.769371	0.9553
0.486019	1.99446	0.234201	1.04958	1.71589	0.330026	0.481529	1.10027	1.24663
0.893762	1.68941	0.512629	0.570078	2.05962	0.681531	NaN	1.09189	1.71411
1.63033	1.58839	0.249101	0.547792	2.11285	0.207303	NaN	1.04924	0.69465
2.34482	1.67978	0.557008	0.96976	1.73845	0.244396	NaN	0.806411	1.39272
1.44082	1.20638	0.26493	0.695987	2.469	0.256516	0.423433	0.370312	0.459544
1.55901	1.33748	0.195733	0.44961	1.46478	0.497868	0.446135	1.37899	0.870924
1.57712	1.23534	0.0451018	0.390261	2.42732	0.471595	0.552637	0.596042	0.538205
1.34618		0.477504	0.652071	1.51407
1.80388		0.221643	0.536654	3.00267
1.26728		0.360913	0.310348	2.59659
1.7279		0.326301	0.763433	3.2443
1.45506		0.316004	0.391806	2.64152
1.85563		0.338738	0.768484	1.19004
1.43623		0.611943	0.314289	1.6418
0.944992		0.473053	0.635939	2.07375
1.1609			0.333065	0.411747
1.2182			0.242978	0.508685
2.01748			0.369931	0.536102
1.2765			0.272276
0.618151			0.455755
1.59876			0.454578
1.2101			0.128003
1.39956			0.281967
1.41895			0.353801
1.178
1.50801
1.0964
1.38929
1.21108
1.5416
1.17263
1.32051
1.34046
1.34324
1.47568
1.38015
1.19692
1.35106
1.57035
1.60989
1.02087
1.1043
1.1996
1.2458
1.14909
1.38824
1.46905
1.52372
1.27757
1.55714
1.58431
1.27793
1.21079
1.34298
1.19665
