# Supplementary material for: A coarse-grained NADH redox model enables inference of subcellular metabolic fluxes from fluorescence lifetime imaging
Source: eLife. 2021 Nov 22;10:e73808. doi: 10.7554/eLife.73808 (PMC8935353; doi:10.7554/eLife.73808)
Supplement: Figure 7—figure supplement 1—source data 1. [file elife-73808-fig7-figsupp1-data1.xlsx]

## Sheet: tmrm ratio
Gal	CCCP	Gal+Rot	Glu	Glu+Rot
5.2524	2.44553	2.38143	7.25839	6.14038
2.50058	2.35754	1.99477	6.96065	7.21346
4.39069	3.12244	1.99966	6.33062	7.07635
3.47268	2.35272	2.03803	7.5887	7.43716
3.72203	2.43423	2.18642	6.30093	7.75816
3.55985	2.37303	2.40223	8.61325	9.16352
3.58332	2.36031	1.95675	8.26154	5.67487
2.46351	2.30483	1.77415	7.23477	7.72361
3.69431	2.90978	1.77168	5.7509	7.64561
3.01838	2.24451	1.78207	7.68385	8.81339
3.69851	2.21271	1.92956	8.65321	8.48547
3.47289	2.18462	2.18275	9.86675	9.10756
3.7816	2.21391	1.84277	7.91199	5.25374
2.58991	2.27552	1.64349	6.69898	8.17327
3.49506	2.80923	1.60192	5.81054	8.08525
3.27676	2.17869	1.5997	7.23055	9.54457
3.25734	2.24471	1.67046	7.44682	8.97413
3.63089	2.2142	1.82633	8.78622	9.55013
7.53959	2.28882	1.90654	4.84393	3.20282
8.10484	2.22994	2.65049	3.88918	5.24747
7.20087	2.60941	1.48941	3.70851	2.75957
11.5827	2.1398	1.52894	3.50807	1.55651
7.68061	2.14692	1.7865	5.30684	2.12645
6.14258	2.0856	1.40228	2.95654	2.07034
9.50713	2.18912	1.44411	3.43675	2.05738
5.32616	2.28874	1.87485	3.64924	3.17959
4.21056	2.34527	1.41501	2.57321	2.37069
3.59388	2.53793	1.37866	3.52598	1.61678
2.80079	2.72443	1.64303	4.37039	2.07258
3.85783	2.17453	1.43602	2.97626	1.96626
3.82858	2.24313	1.40054	3.05465	2.16781
3.23869	1.93887	1.7939	4.10226	3.16554
3.17368	1.93217	1.39725	2.71293	2.29308
2.92017	2.12893	1.40467	3.59595	1.68837
2.63611	2.60497	1.79323	4.27621	1.90087
3.75934	1.82618	1.5038	3.04833	1.91356
3.93643	2.17421	2.12639	5.13672	4.45227
3.13984	2.15903	1.52971	5.65637	5.39554
2.85039	2.18101	2.14077	4.31151	4.2677
2.68314	2.3197	1.92023	6.00721	4.23987
3.00493	2.67567	1.72039	7.74718	4.30938
2.67522	1.81508	2.39868	4.38839	2.91575
3.53055	1.98257	1.46541	4.35002	3.74896
3.45281	2.1725	1.7018	5.49438	4.38902
3.33951	2.22296	1.58348	4.40703	3.49885
5.1002	2.14103	1.63949	7.15238	3.26695
4.6065	2.33413	2.42035	7.21303	3.47124
3.34762	1.89783	1.96755	4.74706	2.68316
3.84329	2.40208	1.56022	4.36113	3.3014
4.25697	1.54592	1.7449	3.52269	1.9852
3.84584	1.94029	2.09522	3.16856	1.94241
5.6865	2.25394	1.51684	2.46425	2.49497
5.01793	1.72358	1.65418	3.31958	2.18701
3.59817	1.8019	1.64316	3.54431	2.23456
4.01576	2.01706	2.21014	9.20391	1.70066
4.76158	1.80839	1.60842	2.97334	1.87728
4.33889	1.91558	1.94608	2.86991	1.83194
5.90175	2.47218	1.53213	2.32216	2.29916
5.2192	1.90906	1.53583	3.15365	2.11012
4.48821	2.09879	1.67922	3.303	2.14623
2.86852	2.97018	2.68174	8.5089	1.86206
3.33603	2.65211		7.12865
3.75949	1.94497		9.06556
4.06035	2.34677		5.22531
5.84988	1.93285		7.68819
5.37474	2.06866		7.44541
2.80266	2.72983		7.27396
3.48196	2.37997		5.15051
3.87027	2.03047		5.97724
4.36245	2.71688		4.062
5.80829	1.92089		6.11353
4.71945	2.04934		6.3802
2.6079			7.04521
3.08904			4.96212
3.27305			5.16896
4.17839			3.78483
5.05614			6.78678
4.70291
2.72953
2.65957
2.04674
2.39454
2.4299
2.20283
1.72416
2.1167
1.98149
2.12091
2.51801
2.35427
1.70255
1.97564
1.83144
2.27572
2.63544
2.4079
1.71038
4.51697
3.37134
3.1607
2.90609
2.54563
2.90318
3.50507
2.90769
2.74804
2.70055
2.39381
2.51681
4.2951
4.24691
3.43968
3.62674
5.62832
4.05419
3.35147
3.22369
3.00213
3.08586
3.87337
3.97257
4.69436
4.07573
4.33386
6.74816
4.34574
3.40497
4.38503
4.5325
4.315
6.6088
4.23108
3.2415
4.17563
4.59165
3.50925
3.02867
2.544
4.03291
3.27595
3.24531
2.80555
2.90775
2.83992
3.72505
