# Supplementary material for: A coarse-grained NADH redox model enables inference of subcellular metabolic fluxes from fluorescence lifetime imaging
Source: eLife. 2021 Nov 22;10:e73808. doi: 10.7554/eLife.73808 (PMC8935353; doi:10.7554/eLife.73808)
Supplement: Figure 7—source data 1. [file elife-73808-fig7-data1.xlsx]

## Sheet: intensity
Gal	CCCP	Gal+Rot	Glu	Glu+Rot
161325	145865	142384	197615	235749
157058	149388	140317	195147	240362
157430	154957	141179	196959	231363
155388	149588	140327	193698	233596
144438	152096	148287	186694	241197
152122	154297	155142	201478	243231
138572	146913	137279	209866	225393
145487	138694	132276	202649	235272
140599	153793	136618	205866	234500
144737	150343	138981	207217	239426
138789	152742	145151	199120	243430
148866	157598	156713	204712	243993
133354	147495	130871	214085	216761
148672	140045	129549	208526	238980
141312	155396	138909	210332	237483
148796	151254	138312	213410	243738
139514	156174	146993	203981	248076
148938	161430	154873	210955	249624
169043	152212	201171	183471	199638
139582	145625	209186	169913	202935
140102	158011	198117	171296	198314
137174	154418	198502	177562	195337
153885	156495	194728	164676	214129
148404	159698	181137	163572	214306
148767	152102	183065	182571	199042
140882	142071	193057	158367	211630
138272	164221	173602	161869	207587
142329	175943	178531	165801	198577
130520	128728	186606	165228	217742
136640	127145	170236	154691	214620
139580	125450	169367	172072	202650
129952	132785	181850	147428	219319
122978	150397	166833	153901	206444
137807	162433	173444	152202	199210
124973	131294	177500	155083	220690
136323	129394	160353	156667	212891
137464	135084	202144	171795	222953
131475	134284	187782	170673	230367
124755	158726	192821	149046	220637
139834	170833	188319	171120	218531
127674	134641	145589	170280	222748
137002	139706	197438	167318	231050
180011	137602	171891	174282	225308
166914	133018	156013	175635	237151
188052	169910	175319	161432	226100
267001	172668	172694	173643	226534
153859	136100	127851	178755	224724
151661	141689	166912	170178	234789
165665	144419	148911	175783	225098
152975	157147	137764	156763	179530
184849	122457	131095	165000	184348
182181	136042	133737	157746	179396
144111	137820	137550	175457	188510
145273	144214	143854	160456	200417
166153	137386	124969	170001	194900
150313	145255	132802	155666	177622
180843	119230	125873	162343	182073
180096	133399	131710	153702	187606
143199	139548	127347	175783	190004
145073	148345	140280	160657	196479
154797	143541	123865	178669	188782
173943	98162.2		144433
173098	98603.6		150444
162336	104147		153939
187238	104509		158028
152505	120213		157255
142503	117956		154067
158341	101212		146884
146340	99851.1		152473
146479	110066		141477
198116	115354		154084
140294	121403		161867
134491	116970		153029
167923			147356
140217			153117
146734			137504
197248			161686
137948
135349
172206
141805
135637
139362
179243
154074
167718
134739
124967
130034
173864
147622
169295
139830
125938
134479
174430
146689
178568
141535
185856
145771
150769
140651
185191
138545
171002
135536
138042
133880
174547
165080
131630
145469
149617
155224
141461
152975
127590
130357
136509
160090
127283
108882
141961
131415
146043
128335
111497
111215
140079
134497
148630
132118
115458
122994
134142
119532
121852
112531
119489
107648
115686
111063
111674
107786
113124

## Sheet: bound ratio
Gal	CCCP	Gal+Rot	Glu	Glu+Rot
0.252642	0.261029	0.173817	0.270155	0.215176
0.234221	0.256478	0.179868	0.260657	0.210367
0.228909	0.254721	0.176712	0.255991	0.21754
0.225199	0.255007	0.169984	0.247582	0.216773
0.23749	0.263002	0.17203	0.242749	0.214683
0.22831	0.251317	0.169702	0.238719	0.210975
0.246379	0.271236	0.178613	0.247295	0.223895
0.238308	0.258455	0.180801	0.239939	0.216758
0.221528	0.252622	0.174514	0.237322	0.220791
0.217494	0.270809	0.168678	0.234042	0.218879
0.237316	0.269651	0.169753	0.217808	0.210545
0.22115	0.250398	0.167118	0.226873	0.206799
0.231672	0.260401	0.174859	0.22962	0.220713
0.229668	0.268211	0.175573	0.224375	0.215474
0.219962	0.271192	0.17085	0.226976	0.216324
0.231117	0.271744	0.174603	0.219479	0.207814
0.226958	0.279922	0.172258	0.210239	0.210697
0.217443	0.255874	0.169039	0.212391	0.20196
0.268904	0.254855	0.156666	0.266074	0.18965
0.239639	0.268111	0.170671	0.247464	0.181538
0.24296	0.284709	0.169576	0.244618	0.18676
0.251599	0.280127	0.185575	0.246833	0.184646
0.252091	0.261397	0.152317	0.235156	0.184413
0.234871	0.25164	0.165098	0.247181	0.190986
0.264718	0.263599	0.162228	0.247398	0.188166
0.254067	0.256126	0.175406	0.24169	0.178921
0.25786	0.238833	0.173386	0.233839	0.178769
0.255541	0.221112	0.179326	0.228795	0.187791
0.247125	0.236893	0.158609	0.214053	0.180532
0.248021	0.245828	0.166896	0.230362	0.177505
0.259617	0.258089	0.1684	0.226559	0.180073
0.249179	0.249521	0.175139	0.219283	0.170507
0.243254	0.242536	0.179546	0.223231	0.174479
0.241686	0.229097	0.183479	0.218982	0.182392
0.243005	0.26328	0.162147	0.201959	0.177815
0.239676	0.276752	0.178061	0.224639	0.177132
0.24304	0.264401	0.154018	0.245435	0.182754
0.234552	0.26825	0.151635	0.254395	0.183571
0.241281	0.231433	0.163119	0.254025	0.183347
0.222209	0.223611	0.16402	0.239647	0.168177
0.212466	0.261639	0.182814	0.246515	0.175475
0.234713	0.257035	0.155623	0.240201	0.176706
0.252886	0.24432	0.160936	0.232447	0.172579
0.241069	0.250386	0.164758	0.235007	0.180356
0.250747	0.236801	0.164691	0.236328	0.177788
0.187574	0.232776	0.171938	0.221447	0.160685
0.235484	0.250456	0.189964	0.220809	0.175349
0.242889	0.253119	0.165539	0.216369	0.172392
0.245199	0.22637	0.173439	0.212849	0.16806
0.240994	0.264558	0.173468	0.26165	0.197658
0.240123	0.225929	0.180864	0.244885	0.185764
0.235437	0.253126	0.169956	0.253706	0.188858
0.239687	0.260214	0.183539	0.254298	0.183378
0.240377	0.242687	0.175473	0.240298	0.159934
0.229298	0.232055	0.170696	0.234376	0.184442
0.245147	0.275119	0.179156	0.236701	0.189857
0.230155	0.241246	0.189069	0.22733	0.183826
0.224926	0.257461	0.165671	0.234832	0.179881
0.226145	0.256829	0.190759	0.232897	0.179811
0.230811	0.252428	0.176141	0.219587	0.185215
0.22073	0.250905	0.178142	0.216347	0.186887
0.27223	0.289481		0.252051
0.230306	0.27951		0.242161
0.213163	0.274391		0.238306
0.238724	0.258834		0.240893
0.216566	0.245198		0.239525
0.240087	0.259217		0.235791
0.250639	0.280247		0.229475
0.259099	0.275358		0.229927
0.228767	0.277612		0.221429
0.23958	0.277031		0.224555
0.235002	0.245216		0.225458
0.239514	0.265264		0.21164
0.252312			0.21183
0.248771			0.217031
0.223739			0.211735
0.220136			0.217086
0.241203
0.247051
0.241966
0.260443
0.243559
0.23767
0.255056
0.243795
0.236228
0.259229
0.256146
0.245819
0.23732
0.234708
0.22848
0.246648
0.243771
0.270938
0.225344
0.236357
0.221287
0.249243
0.259699
0.244658
0.250422
0.243291
0.260493
0.256276
0.254303
0.253065
0.240776
0.242264
0.242413
0.259757
0.250052
0.228336
0.232584
0.241274
0.235824
0.253444
0.258257
0.246323
0.250212
0.241885
0.259648
0.284621
0.231861
0.236664
0.223232
0.20644
0.248178
0.278755
0.214722
0.22492
0.212647
0.196315
0.254638
0.251905
0.263487
0.245108
0.237786
0.24469
0.24757
0.253063
0.245229
0.232917
0.240255
0.246599
0.253838

## Sheet: long lifetime (ns)
Gal	CCCP	Gal+Rot	Glu	Glu+Rot
2.08073	1.99967	1.89867	2.3318	2.30623
2.03072	2.11837	1.85275	2.352	2.32676
2.0033	2.10756	1.84002	2.30568	2.34978
2.03182	2.11008	1.8872	2.36069	2.31256
2.00614	2.07691	1.84683	2.30846	2.30448
2.01765	2.08798	1.86354	2.31874	2.30415
1.91526	2.05849	1.86273	2.3756	2.25551
1.94435	2.16152	1.88155	2.34667	2.34437
1.99545	2.18661	1.88102	2.31805	2.31057
1.99223	2.12335	1.92828	2.30293	2.29383
2.02529	2.11633	1.89573	2.36787	2.35013
2.04547	2.17344	1.88935	2.30071	2.34391
1.9707	2.12755	1.91847	2.37274	2.25464
1.95518	2.07138	1.94259	2.39057	2.33537
1.99559	2.20705	1.89406	2.28321	2.33895
1.9335	2.14192	1.90263	2.33945	2.37443
2.00395	2.1202	1.89732	2.36303	2.31046
2.03563	2.12626	1.94995	2.33313	2.36577
2.23181	2.16381	2.12439	2.36965	2.26372
2.0794	2.02219	2.1207	2.26981	2.25545
2.10649	2.13104	2.06455	2.32179	2.15581
2.02317	2.12917	2.03995	2.18858	2.15293
2.09867	2.20933	2.12606	2.30703	2.18045
2.04531	2.15362	2.01035	2.22701	2.12221
2.02222	2.15675	2.05414	2.27456	2.17884
1.97799	2.14214	2.07647	2.13982	2.17657
1.98259	2.1468	2.01098	2.24364	2.17533
1.97441	2.19252	2.09509	2.22851	2.0651
1.86041	1.83585	2.05904	2.26786	2.1813
1.93512	1.88549	1.98873	2.19691	2.18661
1.9092	1.73164	1.98768	2.20375	2.18887
1.91551	1.90279	2.06742	2.13228	2.19677
1.93941	2.08664	1.96654	2.17674	2.15536
1.97939	2.13108	2.05564	2.15926	2.11184
1.83562	1.83108	2.02047	2.22142	2.16171
1.94674	1.87263	1.88542	2.12982	2.15562
1.95693	1.89886	2.11217	2.29243	2.18541
1.94155	1.9042	2.11681	2.31561	2.23994
1.92439	2.14491	2.08728	2.25358	2.18904
2.01846	2.09577	2.1037	2.33465	2.26018
1.97441	1.90737	1.89237	2.35044	2.24581
1.95075	1.96366	2.11823	2.28476	2.21581
2.25058	1.93687	2.04098	2.31122	2.20508
2.11138	1.95466	1.97151	2.32365	2.19782
2.22163	2.16629	2.05112	2.27413	2.18234
1.88693	2.08422	2.04545	2.35613	2.23817
2.07198	2.03158	1.83697	2.38078	2.18918
2.01863	2.05157	2.06645	2.33627	2.23237
2.09793	2.09304	1.93271	2.33746	2.19894
2.00234	2.17574	2.07496	2.2694	2.2385
2.15614	1.85468	1.95872	2.30335	2.21696
2.23364	1.93012	1.97915	2.19175	2.23763
1.96212	1.98767	1.97779	2.30603	2.24392
2.01016	2.01055	1.96208	2.29676	2.32045
2.09492	2.03038	1.93452	2.25911	2.19048
1.93064	2.11274	1.98804	2.30422	2.20561
2.17322	1.77992	1.8696	2.2593	2.13226
2.16774	1.95985	1.98226	2.19245	2.21887
2.00688	2.09849	1.88052	2.32259	2.21211
2.00825	2.06137	1.92556	2.26112	2.17203
2.09524	2.04028	1.87711	2.26403	2.09557
2.10154	1.84966		2.23853
2.16526	1.86593		2.27639
2.13191	1.84671		2.28014
2.1639	1.85522		2.23351
2.14968	2.09438		2.25264
1.95731	2.08545		2.22874
2.10118	1.88359		2.21855
1.88945	1.91684		2.25263
1.99703	1.9239		2.21531
2.11994	1.92733		2.2378
2.04072	2.18633		2.23147
1.86082	2.09009		2.27187
2.01587			2.20521
1.86436			2.21695
1.94245			2.21316
2.15291			2.18051
1.95378
1.80567
2.07077
2.0115
1.96667
1.98569
2.19422
2.15115
1.96449
1.9402
1.89585
1.93458
2.16445
2.10697
1.94697
2.00544
1.8921
1.85909
2.13751
2.06537
1.99782
2.0508
2.19016
1.94001
1.9293
1.86516
2.17195
1.93607
2.15888
1.85616
1.94188
1.84235
2.14432
2.19829
1.95903
2.00606
2.07963
2.17243
2.0493
2.19626
1.96738
1.91682
1.96939
2.1034
1.98904
1.88386
2.04112
2.08309
2.21396
2.0868
1.92687
1.93968
2.03698
2.0555
2.229
2.12334
1.95168
2.10197
2.08079
2.00054
1.99964
1.96866
1.94812
1.89003
2.01647
2.00507
1.8944
1.81874
1.88288

## Sheet: short lifetime (ns)
Gal	CCCP	Gal+Rot	Glu	Glu+Rot
0.283617	0.242531	0.297784	0.302367	0.305184
0.253689	0.273496	0.289423	0.301188	0.309841
0.258136	0.259018	0.28418	0.29081	0.31558
0.261552	0.269005	0.296558	0.307039	0.307334
0.255189	0.252062	0.287055	0.302264	0.303884
0.267478	0.253314	0.29451	0.303323	0.310929
0.253615	0.270288	0.288621	0.323549	0.300986
0.240685	0.286051	0.292918	0.314694	0.317069
0.256989	0.269273	0.297242	0.307476	0.307278
0.259195	0.276469	0.305429	0.308371	0.308566
0.278223	0.279038	0.297545	0.319901	0.320083
0.269132	0.274317	0.296391	0.312927	0.319913
0.264869	0.279874	0.294683	0.327567	0.299229
0.248061	0.272957	0.305654	0.329264	0.321818
0.260803	0.299081	0.295574	0.308435	0.317142
0.262426	0.289344	0.297226	0.321087	0.321973
0.278615	0.290285	0.299845	0.329059	0.315615
0.275519	0.27959	0.307134	0.324525	0.327218
0.291374	0.28935	0.300338	0.297399	0.304419
0.25144	0.255642	0.293442	0.287235	0.298687
0.26567	0.28955	0.28275	0.292447	0.291334
0.260148	0.287881	0.278291	0.259723	0.284368
0.266237	0.300429	0.296873	0.30163	0.286451
0.25852	0.28759	0.278679	0.288705	0.286239
0.271678	0.297763	0.28917	0.295854	0.289923
0.26282	0.287247	0.288831	0.284388	0.295821
0.26373	0.251974	0.275965	0.2954	0.299393
0.256259	0.280577	0.280662	0.287096	0.279071
0.229803	0.189344	0.291383	0.306153	0.294821
0.253613	0.195836	0.274294	0.289364	0.297927
0.2556	0.177418	0.278616	0.284424	0.300407
0.24381	0.207656	0.289907	0.280623	0.30237
0.260503	0.254926	0.272564	0.291965	0.2965
0.256476	0.275767	0.27932	0.28995	0.293367
0.226	0.203989	0.292773	0.297952	0.294502
0.256585	0.218959	0.268663	0.2936	0.294764
0.265071	0.226058	0.299519	0.298808	0.295843
0.254196	0.222309	0.293984	0.293236	0.29716
0.263515	0.281248	0.296004	0.28562	0.297847
0.268355	0.272924	0.298374	0.308568	0.311634
0.245318	0.235395	0.263414	0.318395	0.303885
0.26318	0.246889	0.303059	0.306329	0.30384
0.29471	0.227676	0.288686	0.315191	0.307114
0.276396	0.243342	0.278573	0.311767	0.301002
0.279978	0.280783	0.291282	0.306149	0.303845
0.190992	0.281914	0.289283	0.330575	0.311005
0.28521	0.262492	0.25332	0.327619	0.301756
0.270833	0.286247	0.294598	0.323285	0.307141
0.283171	0.243955	0.278242	0.32626	0.306624
0.262232	0.26622	0.28722	0.280767	0.292186
0.276679	0.199804	0.280304	0.293151	0.29821
0.298143	0.220711	0.284747	0.272419	0.299112
0.271572	0.245949	0.273482	0.284729	0.299283
0.277522	0.235075	0.267208	0.29489	0.296326
0.284181	0.233941	0.278449	0.289234	0.29318
0.255585	0.254445	0.280967	0.2892	0.293322
0.28867	0.192681	0.270144	0.296697	0.294298
0.285042	0.23185	0.288919	0.290294	0.303813
0.274789	0.258583	0.261521	0.301696	0.305503
0.278883	0.252518	0.261314	0.298741	0.29848
0.279095	0.246128	0.274035	0.299424	0.289163
0.257531	0.195947		0.28332
0.282864	0.201097		0.289544
0.267968	0.20309		0.286927
0.269165	0.190763		0.281364
0.286827	0.260293		0.279596
0.252783	0.256952		0.284596
0.277701	0.204464		0.295964
0.245955	0.218665		0.297747
0.250994	0.222647		0.29349
0.276203	0.21708		0.296481
0.262617	0.278086		0.294637
0.222029	0.268065		0.295622
0.256862			0.29707
0.237006			0.297367
0.24163			0.298972
0.282902			0.300384
0.246725
0.211068
0.280627
0.260739
0.250448
0.260215
0.286852
0.281173
0.257186
0.254099
0.252984
0.252658
0.295193
0.288739
0.254984
0.268778
0.233721
0.247588
0.304036
0.283915
0.273085
0.263219
0.275787
0.24312
0.25472
0.223957
0.268484
0.247876
0.281568
0.233903
0.253576
0.219292
0.273522
0.286279
0.253321
0.26828
0.278799
0.279773
0.267475
0.294604
0.260147
0.245778
0.262769
0.275094
0.266414
0.235077
0.276069
0.281954
0.2936
0.283764
0.233588
0.249784
0.265266
0.272877
0.284022
0.293741
0.259652
0.261261
0.250653
0.234422
0.23177
0.235989
0.232579
0.239549
0.255755
0.251743
0.231004
0.207681
0.225339

## Sheet: nad(p)hf (uM)
Gal	CCCP	Gal+Rot	Glu
45.4413	43.4942	51.7005	48.3189
49.0904	41.6919	51.3698	48.6579
50.073	44.3848	52.8168	50.9608
49.2579	42.2507	51.8164	49.5289
45.0037	43.4323	55.8951	49.3355
47.6257	45.2066	57.9053	53.602
43.5411	40.4166	50.3664	52.5135
47.107	37.4291	47.6281	52.6295
45.8502	42.668	49.7893	54.7215
47.6456	40.2497	50.2341	55.7466
41.6919	40.9778	53.4246	54.3191
47.0355	43.8903	58.3603	55.8944
42.1378	40.3204	47.3434	55.9413
48.6173	38.5317	45.6643	54.9131
46.0352	39.4646	51.1419	58.0007
47.8216	39.5684	50.0924	58.2938
43.363	40.2831	53.4705	56.3042
47.2768	44.6788	55.4452	58.641
43.2241	41.2676	72.4291	45.0739
42.4398	41.6097	72.7603	45.6261
41.0793	40.1887	71.3642	45.3843
40.6541	39.8059	68.8898	50.6003
44.1089	40.6344	71.5152	44.4707
45.7843	43.8862	67.6268	44.4336
42.0236	40.0254	67.0482	48.4745
41.961	38.7443	67.3896	45.0389
40.6736	48.9547	63.3553	44.9968
42.6462	52.4035	62.0051	47.4247
43.1485	47.0085	68.8366	47.5815
42.4618	43.9589	64.0164	44.3314
42.3535	45.8047	62.9484	50.0514
41.0806	44.355	63.5811	44.9183
38.2836	45.0512	60.787	45.1011
42.7484	48.4669	60.227	45.4855
42.3901	43.6245	65.2222	47.3523
42.9719	40.0111	60.4815	46.2591
42.3073	42.2921	73.7491	45.4609
42.2369	41.7557	69.6084	44.0958
39.0737	46.5286	69.0602	39.5957
44.466	52.5149	66.7202	44.9376
43.7785	41.7907	54.4638	43.2349
43.3134	42.3717	71.1359	44.6034
47.5029	44.754	63.492	46.6074
48.4471	41.3814	58.9407	46.6726
51.2139	48.7962	63.5301	43.6233
111.694	51.3138	61.4177	46.4415
45.3658	40.2239	48.391	47.7537
45.4224	40.0966	59.762	46.8083
47.3492	45.8677	55.3359	48.643
46.8218	42.554	48.5268	40.8616
53.0428	45.1097	47.0942	43.8789
50.3989	43.7238	49.0836	43.4045
44.2821	41.167	49.2643	45.9131
43.533	45.4696	53.6268	43.1952
49.5412	44.4172	46.8039	47.3343
47.0112	39.6224	47.5148	42.5176
52.2596	43.6915	46.0115	45.6715
53.1367	41.2928	48.6366	43.517
44.801	39.8871	46.804	47.5558
44.5454	43.755	53.254	46.0525
47.5845	43.1658	46.4085	51.6059
47.7947	30.5953		38.8475
50.4896	31.1048		40.7888
51.2257	33.4474		42.264
54.3217	35.5073		43.964
46.2072	35.413		43.7615
44.949	33.7152		43.3532
44.8758	31.505		41.5912
45.3558	30.4924		42.6114
47.1731	33.1561		41.1354
57.5979	35.0141		43.9618
43.0905	33.99		46.2545
45.915	32.4192		44.9288
50.0068			43.9561
45.6102			44.8347
49.4645			40.8368
59.4113			47.6357
43.7985
46.9509
50.2199
41.1993
42.3879
43.3909
48.2695
43.5972
53.009
40.5716
38.5696
40.7057
48.9999
42.9638
55.1455
41.7539
41.3101
40.8044
50.6078
43.3106
56.9176
41.6653
50.1648
46.2967
46.5798
47.3086
50.6027
42.4474
46.9332
43.9103
43.6368
45.8502
50.1549
43.8956
40.3755
45.6552
44.7308
44.0152
42.9538
40.9667
37.86
41.391
41.1875
46.5561
37.063
32.1821
43.1874
38.6573
42.258
40.9415
35.7081
32.0724
45.4456
41.7029
44.698
42.3843
34.786
35.4568
38.2756
37.5962
39.2747
35.7426
38.1026
34.1846
35.1505
35.2246
37.102
37.4454
36.6675

## Sheet: rox (a.u.)
Gal	CCCP	Gal+Rot	Glu
0.439146	0.484674	0.0112226	0.433275
0.33914	0.459968	0.0440727	0.381714
0.310302	0.450433	0.0269402	0.356383
0.290164	0.451982	-0.00958467	0.310733
0.356887	0.495389	0.00152427	0.284496
0.307052	0.431953	-0.0111164	0.262614
0.405147	0.540089	0.0372593	0.30917
0.361332	0.470703	0.0491351	0.269239
0.270232	0.439037	0.0150097	0.25503
0.248336	0.537768	-0.0166734	0.237224
0.355944	0.53148	-0.0108415	0.149095
0.26818	0.426962	-0.0251451	0.198305
0.325305	0.481266	0.0168821	0.213217
0.314423	0.523667	0.0207568	0.184746
0.261731	0.539848	-0.00488176	0.198864
0.32229	0.542844	0.0154882	0.158168
0.299714	0.587243	0.00275807	0.108005
0.248057	0.456693	-0.0147133	0.11969
0.527425	0.45116	-0.0818868	0.411118
0.368552	0.52312	-0.00585629	0.310089
0.386583	0.613231	-0.0118008	0.294638
0.433481	0.588352	0.0750528	0.306664
0.436153	0.486671	-0.105493	0.243272
0.34267	0.433703	-0.0361079	0.308556
0.504703	0.49863	-0.0516885	0.30973
0.446878	0.45806	0.0198522	0.278742
0.467475	0.36418	0.00888458	0.236123
0.454885	0.267976	0.0411303	0.208739
0.409196	0.353645	-0.0713365	0.12871
0.41406	0.402152	-0.0263511	0.217248
0.477013	0.468713	-0.0181843	0.196605
0.420348	0.4222	0.0184026	0.1571
0.388182	0.384281	0.042322	0.178536
0.379665	0.311324	0.0636764	0.15547
0.38683	0.496897	-0.0521307	0.0630558
0.368756	0.570031	0.0342637	0.186178
0.38702	0.502983	-0.0962595	0.299077
0.340937	0.523875	-0.109199	0.347718
0.37747	0.324007	-0.0468509	0.345708
0.273933	0.281543	-0.0419644	0.267655
0.221037	0.487988	0.0600672	0.304941
0.341814	0.462993	-0.0875478	0.270662
0.440467	0.393966	-0.0587059	0.228568
0.37632	0.426898	-0.0379552	0.242463
0.428857	0.353149	-0.0383188	0.249637
0.0859056	0.331297	0.00102516	0.168848
0.346001	0.427276	0.0988808	0.165386
0.386201	0.441733	-0.0337135	0.141281
0.398739	0.296519	0.00916961	0.122174
0.37591	0.503834	0.00932812	0.387101
0.37118	0.294128	0.0494772	0.296091
0.345745	0.44177	-0.00973992	0.343977
0.368815	0.480251	0.0640005	0.347188
0.37256	0.385099	0.0202136	0.27119
0.312415	0.327382	-0.00572159	0.239041
0.398458	0.561165	0.0402096	0.251658
0.317068	0.377281	0.0940222	0.20079
0.288683	0.465305	-0.0329972	0.241512
0.295302	0.461876	0.1032	0.231012
0.32063	0.437986	0.0238389	0.158751
0.265903	0.429715	0.0347001	0.141162
0.545482	0.639134		0.334993
0.317887	0.585003		0.281302
0.224823	0.557214		0.260375
0.363589	0.472762		0.274417
0.243296	0.398736		0.266994
0.370986	0.474839		0.246719
0.42827	0.589007		0.212432
0.474198	0.562462		0.214888
0.309531	0.5747		0.168751
0.368233	0.571548		0.185725
0.343382	0.398828		0.190627
0.367876	0.507664		0.115609
0.437353			0.116643
0.418131			0.144876
0.282239			0.116128
0.262678			0.145178
0.377045
0.408794
0.381189
0.481495
0.389837
0.357866
0.452251
0.391119
0.350039
0.474906
0.458169
0.402106
0.355966
0.341785
0.307975
0.406607
0.390985
0.53847
0.290951
0.350739
0.268929
0.420694
0.477454
0.395801
0.427091
0.388382
0.481768
0.458873
0.448164
0.441441
0.374725
0.382804
0.383613
0.47777
0.425085
0.307191
0.330256
0.377433
0.347843
0.443497
0.469625
0.404841
0.425955
0.38075
0.47718
0.61275
0.326328
0.352405
0.279486
0.188325
0.414912
0.580905
0.233287
0.288649
0.22202
0.133362
0.449979
0.435146
0.49802
0.398243
0.358498
0.395975
0.411611
0.441431
0.398904
0.332061
0.3719
0.406341
0.445637

## Sheet: jox (a.u.)
Gal	CCCP	Gal+Rot	Glu
19.9554	21.0805	0.580215	20.9354
16.6485	19.1769	2.264	18.5734
15.5377	19.9923	1.4229	18.1616
14.2929	19.0965	-0.496643	15.3903
16.0612	21.5159	0.0851996	14.0357
14.6236	19.5272	-0.6437	14.0766
17.6405	21.8286	1.87662	16.2356
17.0212	17.618	2.34021	14.1699
12.3902	18.7328	0.747323	13.9556
11.8321	21.645	-0.837572	13.2244
14.84	21.7789	-0.579201	8.09871
12.614	18.7395	-1.46748	11.0841
13.7076	19.4048	0.799257	11.9276
15.2864	20.1778	0.947846	10.145
12.0488	21.3049	-0.249662	11.5342
15.4125	21.4794	0.775839	9.22022
12.9965	23.656	0.147476	6.08114
11.7274	20.4045	-0.81578	7.01874
22.7975	18.6183	-5.93099	18.5307
15.6413	21.7669	-0.426106	14.1481
15.8806	24.645	-0.842154	13.3719
17.6228	23.4199	5.17037	15.5173
19.2382	19.7756	-7.54438	10.8185
15.6889	19.0336	-2.44187	13.7102
21.2094	19.9578	-3.46562	15.014
18.7515	17.7472	1.33783	12.5543
19.0139	17.8283	0.562885	10.6248
19.3991	14.0429	2.55029	9.8994
17.6562	16.6243	-4.91056	6.12422
17.5817	17.6781	-1.6869	9.63088
20.2032	21.4692	-1.14468	9.84033
17.2682	18.7267	1.17006	7.05667
14.861	17.3123	2.57263	8.05216
16.2301	15.0889	3.83504	7.07161
16.3978	21.6769	-3.40008	2.98584
15.8461	22.8076	2.07232	8.61242
16.3738	21.2722	-7.09905	13.5963
14.4002	21.8747	-7.60119	15.3329
14.7491	15.0756	-3.23554	13.6885
12.1807	14.7852	-2.79987	12.0278
9.67667	20.3934	3.27149	13.1841
14.8051	19.6178	-6.22779	12.0725
20.9235	17.6315	-3.72736	10.653
18.2316	17.6657	-2.23711	11.3164
21.9634	17.2323	-2.43439	10.89
9.59517	17.0001	0.0629627	7.84154
15.6966	17.1867	4.78494	7.89779
17.5422	17.712	-2.01479	6.61313
18.88	13.6006	0.507409	5.94292
17.6008	21.4402	0.452664	15.8176
19.6884	13.268	2.33009	12.9921
17.4252	19.3159	-0.47807	14.9302
16.3319	19.7705	3.15294	15.9405
16.2187	17.5103	1.08399	11.7141
15.4774	14.5414	-0.267793	11.3148
18.732	22.2347	1.91055	10.6999
16.5698	16.484	4.3261	9.17036
15.3397	19.2138	-1.60487	10.5099
13.2298	18.4229	4.83016	10.986
14.2826	19.1641	1.26952	7.31086
12.6529	18.549	1.61038	7.28477
26.0711	19.5545		13.0136
16.05	18.1964		11.474
11.5167	18.6374		11.0045
19.7508	16.7865		12.0645
11.242	14.1204		11.6841
16.6755	16.0093		10.6961
19.219	18.5567		8.83531
21.5076	17.1508		9.15668
14.6015	19.0548		6.94162
21.2094	20.0123		8.16482
14.7965	13.5562		8.81734
16.891	16.4581		5.19416
21.8706			5.12716
19.071			6.49549
13.9608			4.7423
15.6061			6.91567
16.514
19.1932
19.1433
19.8373
16.5244
15.5281
21.8299
17.0517
18.5552
19.2677
17.6714
16.368
17.4423
14.6844
16.9834
16.9774
16.1516
21.972
14.7244
15.1907
15.3068
17.5283
23.9514
18.3243
19.8938
18.3738
24.3788
19.478
21.0337
19.3838
16.3518
17.5517
19.2401
20.972
17.163
14.0249
14.7726
16.6128
14.9412
18.1686
17.78
16.7568
17.544
17.7262
17.6857
19.7195
14.0933
13.6231
11.8105
7.71029
14.8157
18.631
10.6019
12.0375
9.92387
5.65245
15.6529
15.4289
19.062
14.9724
14.0799
14.1532
15.6834
15.0902
14.0217
11.6967
13.7982
15.2156
16.3404
