# Supplementary material for: A coarse-grained NADH redox model enables inference of subcellular metabolic fluxes from fluorescence lifetime imaging
Source: eLife. 2021 Nov 22;10:e73808. doi: 10.7554/eLife.73808 (PMC8935353; doi:10.7554/eLife.73808)
Supplement: Figure 8—figure supplement 1—source data 1. [file elife-73808-fig8-figsupp1-data1.xlsx]

## Sheet: intensity
AKSOM	9mM oxa	18.1uM pyr	181uM pyr	1.81mM pyr	11mM AOA	0mM K	2.55mM K	15mM K	1mM cyclo	10uM noco	10uM latA	10uM gram	2mM oua
333531	280738	266256	308418	361413	404223	373407	530530	365758	389829	280698	263880	333321	206907
283665	266215	251818	300373	338833	348985	357276	551847	359967	376463	295933	336148	290219	190453
299694	277368	259980	289572	351013	481136	365594	546711	331089	370447	323563	326905	332813	228554
254847	270542	260117	329371	329194	344455	359337	512563	317276	375534	280237	269209	267356	230458
278709	277101	369133	380060	329262	398513	297844	440146	472876	341518	288449	326666	341637	210297
258525	280912	368171	341653	308943	465149	343843	423381	460155	294646	330046	356415	287672	232311
332896	280151	367001	340250	342838	407066	298817	413498	498096	268147	278178	280632	360227	242663
364933	265212	355730	409087	370239	392194	352244	430514	464952	365759	291912	320840	307530	222163
310584	244569	363300	414043	477789	577260	349525	301937	267721	337201	308676	285829	381810	266464
346191	264905	311812	407037	428669	358070	332588	302928	270764	289022	277921	261374	346737	231836
372244	221855		423709	429392	520327	326135	304091	264177	264456	283496	296463	306097	236517
367317	221126		530530	461625	483809	331295	298917	263438		328193	313484	357149	242575
375716	219221		551847	452924	445184	276928	315952			399264	288963	295301	173996
428529	229264		546711	474620	389717	295336	323428			358235	356280	334917	181047
319644	197838		512563	457590	505376	291876	317277			NaN	319044	354335	169329
296735	192649		440146		442562	288540	300310			375908	241591	320566	179987
262471	205117		423381		452452	374528	332309			434169	326301	329804	149169
294936	237264		413498		522502	352849	335655			379829	258032	390113	179899
183192	193361		430514			288352	265270			370256			157597
164287	226145		301937			294416	325829			402131			167022
205476			302928							327697			171326
279834			304091							375565			157714
304069			298917							391874			177230
233511			315952							333472			155811
305268			323428										303392
251552			317277										265024
278838			300310										284854
306741			332309										297551
293141			335655										288979
293581			265270										201592
307243			325829										394508
302671													355429
322614													338143
305345													363615
291744													351271
296374													349917
411620													314990
409148													337167
444209													242143
428169													289552
352479													308156
325147													280422
293114													347254
260628													348079
336482													293101
350926													319493
345278													390793
336150													311097
566887													365692
580300													288990
554246													371732
547360													318040
415082													348212
433415													349943
420079													382697
415378													367537
294853													369773
320163													NaN
274771													363651
293255													349399
318811													354562
339280													NaN
334465
309636
507713
458776
431731
434487
510525
459062
433977
431407

## Sheet: bound ratio
AKSOM	9mM oxa	18.1uM pyr	181uM pyr	1.81mM pyr	11mM AOA	0mM K	2.55mM K	15mM K	1mM cyclo	10uM noco	10uM latA	10uM gram	2mM oua
0.584732	0.582049	0.531518	0.538625	0.520538	0.637743	0.539974	0.536403	0.507942	0.597793	0.584476	0.630665	0.581725	0.586239
0.810263	0.616101	0.510766	0.536771	0.525561	0.635923	0.490828	0.569868	0.549207	0.686613	0.500036	0.623082	0.585786	0.63061
0.629948	0.741087	0.619255	0.55063	0.493549	0.598468	0.511088	0.49787	0.492623	0.62588	0.522381	0.629227	0.553576	0.575961
0.611042	0.821377	0.547435	0.578054	0.592946	0.64807	0.652124	0.506578	0.519349	0.548893	0.606244	0.572076	0.674171	0.576459
0.511304	0.61087	0.481414	0.531429	0.572049	0.578439	0.544281	0.577365	0.491657	0.563307	0.538174	0.586186	0.541472	0.582445
0.566206	0.718792	0.514959	0.597516	0.557607	0.619892	0.561594	0.517692	0.521106	0.574471	0.509183	0.594476	0.576631	0.575645
0.701165	0.69922	0.557205	0.56396	0.561062	0.609486	0.544411	0.582499	0.491425	0.635087	0.630418	0.599242	0.635697	0.568086
0.662987	0.606175	0.502881	0.541686	0.53901	0.599184	0.558924	0.485647	0.534705	0.561677	0.507368	0.591355	0.690908	0.5989
0.650309	0.67836	0.507905	0.752622	0.464901	0.592067	0.516889	0.557964	0.556424	0.588108	0.460629	0.589282	0.562824	0.563002
0.62627	0.540828	0.598292	0.577392	0.567876	0.611935	0.508245	0.556544	0.512963	0.604696	0.572357	0.645027	0.621162	0.568509
0.463243	0.603322		0.625151	0.530544	0.594897	0.551241	0.645234	0.537161	0.634979	0.57337	0.619524	0.586694	0.542467
0.534959	0.615205		0.536403	0.494224	0.575623	0.568517	0.578388	0.567657		0.53602	0.594685	0.536571	0.586941
0.551523	0.662631		0.569868	0.547122	0.571597	0.584171	0.542521			0.521507	0.571465	0.578779	0.593371
0.557563	0.632514		0.49787	0.519955	0.585463	0.543393	0.519051			0.510021	0.636933	0.605659	0.584748
0.60966	0.603324		0.506578	0.487678	0.572667	0.583426	0.573775			NaN	0.599591	0.625362	0.570399
0.581277	0.597785		0.577365		0.524986	0.686481	0.54844			0.539735	0.578402	0.578753	0.591012
0.69687	0.620002		0.517692		0.597086	0.489668	0.492825			0.507069	0.595667	0.588529	0.595436
0.576095	0.572007		0.582499		0.610388	0.476804	0.51804			0.516285	0.605064	0.526186	0.610968
0.609879	0.573072		0.485647			0.511887	0.518079			0.512258			0.621297
0.671136	0.57101		0.557964			0.495032	0.485387			0.51135			0.614826
0.577148			0.556544							0.534735			0.594399
0.611768			0.645234							0.529221			0.662949
0.536473			0.578388							0.581294			0.618324
0.593303			0.542521							0.513603			0.686145
0.567128			0.519051										0.651347
0.632804			0.573775										0.62778
0.573166			0.54844										0.624293
0.553027			0.492825										0.628321
0.536012			0.51804										0.567974
0.528961			0.518079										0.751192
0.617282			0.485387										0.621423
0.58596			0.6193										0.588729
0.487693			0.606118										0.593521
0.607261			0.640963										0.610823
0.535989			0.620386										0.524842
0.56655			0.599086										0.575045
0.601641			0.578839										0.579919
0.561672			0.635179										0.629045
0.574553			0.618849										0.6066
0.531678			0.592613										0.650268
0.589603			0.522208										0.596018
0.574585			0.573561										0.598618
0.596507			0.566583										0.559015
0.572027			0.58245										0.532091
0.549305			0.61053										0.492983
0.558711			0.569523										0.619108
0.511553			0.554344										0.540125
0.583029			0.581151										0.542078
0.58748			0.579403										0.611192
0.549561													0.613831
0.568355													0.607573
0.583303													0.600072
0.567091													0.592685
0.526447													0.570046
0.521895													0.588528
0.55871													0.580726
0.547206													0.547006
0.563965													NaN
0.590242													0.571108
0.60292													0.558625
0.59204													0.577625
0.54307													NaN
0.532097
0.604114
0.55806
0.504323
0.556333
0.54955
0.573613
0.504389
0.552092
0.559887

## Sheet: long lifetime (ns)
AKSOM	9mM oxa	18.1uM pyr	181uM pyr	1.81mM pyr	11mM AOA	0mM K	2.55mM K	15mM K	1mM cyclo	10uM noco	10uM latA	10uM gram	2mM oua
2.16312	2.03031	2.10945	2.10152	2.26317	2.13691	2.0494	2.1425	2.08223	2.14817	1.92722	2.14493	2.19859	2.13103
1.98698	2.04541	2.08872	2.15692	2.24764	2.05224	2.09924	2.09373	2.11264	2.12237	1.9999	2.09324	2.16906	2.02532
2.14046	1.94404	2.0252	2.08553	2.3135	2.12724	2.11024	2.19988	2.21121	2.18566	1.99696	2.10172	2.23607	2.20641
2.13884	1.90928	2.1099	2.13419	2.19202	2.0278	2.06247	2.21915	2.14392	2.15012	1.90402	2.18439	2.08544	2.14418
2.2692	1.9672	2.1596	2.11869	2.14559	2.16903	1.96743	2.08027	2.18238	2.17629	1.94244	2.19704	2.27257	2.09165
2.25752	1.93374	2.13546	2.0955	2.15152	2.12492	2.02792	2.15246	2.05852	2.16077	1.98884	2.13512	2.2614	2.13681
1.996	1.99408	2.10831	2.11367	2.16681	2.15586	2.08887	2.10043	2.18018	2.17025	1.89306	2.1569	2.19279	2.11135
2.01019	2.04446	2.11422	2.1064	2.26848	2.09987	2.08081	2.19982	2.21837	2.13192	1.98491	2.12843	2.07841	2.03997
2.09044	1.99535	2.14691	1.9633	2.22887	2.23404	2.10941	2.08572	2.0217	2.13873	1.98255	2.11951	2.22733	2.14471
2.11141	2.09701	2.05534	2.0915	2.16136	2.15304	2.02218	2.01051	2.1378	2.0917	1.92753	2.0884	2.17978	2.04204
2.30092	2.0796		2.14015	2.24518	2.12545	2.09867	2.04666	2.04399	2.17087	1.90099	2.08095	2.11898	2.17396
2.25799	2.01547		2.1425	2.229	2.2285	2.04686	2.11075	2.07092		1.96212	2.12976	2.25118	2.10475
2.14561	1.99641		2.09373	2.13486	2.17731	1.97416	2.04511			2.0194	2.18686	2.28437	2.18279
2.22259	2.05097		2.19988	2.2785	2.18436	2.10279	2.09532			1.97686	2.11185	2.19244	2.11876
2.13705	2.00744		2.21915	2.28515	2.08571	2.08167	2.02432			NaN	2.15323	2.1325	2.19208
2.14097	2.09931		2.08027		2.19389	2.04271	2.09373			1.97058	2.26328	2.2867	2.15228
2.06027	2.11858		2.15246		2.08489	2.025	2.1244			1.99728	2.12192	2.16808	2.11839
2.21964	2.07737		2.10043		2.15846	2.09177	1.98588			1.99002	2.09248	2.21999	2.16205
2.05198	2.10511		2.19982			2.00429	2.08045			2.013			2.06047
1.98579	2.02579		2.08572			2.10712	2.09641			2.01681			2.07705
2.12103			2.01051							1.95564			2.09202
2.08042			2.04666							2.01533			2.0152
2.15699			2.11075							1.9579			2.08139
2.09818			2.04511							1.93736			1.96902
2.1451			2.09532										2.10714
2.10535			2.02432										2.13142
2.15797			2.09373										2.07257
2.1477			2.1244										2.22441
2.16126			1.98588										2.22653
2.21171			2.08045										1.95338
2.13147			2.09641										2.16338
2.16517			2.00432										2.1008
2.25866			1.99669										2.21727
2.11798			1.98782										2.20478
2.22377			1.96561										2.34144
2.17169			2.0232										2.13597
2.09006			2.04582										2.19883
2.16108			1.97924										2.1824
2.11931			2.00673										2.2273
2.16719			2.03839										2.14338
2.11783			2.14658										2.24197
2.0875			2.02904										2.19876
2.11425			2.02946										2.31252
2.1079			2.09739										2.39006
2.18331			2.04302										2.49825
2.09281			2.05932										2.20796
2.21092			2.10847										2.26256
2.14541			2.06852										2.37416
2.15285			2.0777										2.17093
2.20343													2.19476
2.18714													2.17924
2.17205													2.13405
2.16978													2.15743
2.21941													2.21481
2.21185													2.22997
2.23418													2.21217
2.16348													2.23881
2.11589													NaN
2.12052													2.17449
2.10772													2.25031
2.10096													2.19052
2.17811													NaN
2.10152
2.19808
2.13696
2.2068
2.16093
2.22067
2.10301
2.19131
2.15678
2.18411

## Sheet: short lifetime (ns)
AKSOM	9mM oxa	18.1uM pyr	181uM pyr	1.81mM pyr	11mM AOA	0mM K	2.55mM K	15mM K	1mM cyclo	10uM noco	10uM latA	10uM gram	2mM oua
0.479737	0.349418	0.405413	0.390275	0.469685	0.562185	0.3718	0.410548	0.371617	0.45993	0.317031	0.50922	0.502456	0.458917
0.471496	0.368207	0.374942	0.415742	0.44283	0.515053	0.375291	0.433125	0.417416	0.512978	0.351834	0.48156	0.508133	0.456732
0.495799	0.385704	0.40977	0.415413	0.465235	0.558693	0.401454	0.421267	0.410578	0.548928	0.319207	0.462997	0.552444	0.523391
0.404458	0.38058	0.416667	0.44663	0.472239	0.496034	0.437969	0.466814	0.43114	0.52803	0.328021	0.465916	0.48955	0.48781
0.462223	0.339712	0.376416	0.396151	0.415708	0.595743	0.335729	0.432555	0.399872	0.549711	0.295148	0.521336	0.556213	0.462705
0.463581	0.348865	0.389318	0.434095	0.434	0.562856	0.382348	0.426132	0.373061	0.542655	0.358889	0.472671	0.551334	0.490589
0.413018	0.404185	0.426288	0.416656	0.435817	0.565144	0.394518	0.45812	0.418537	0.648977	0.31045	0.493638	0.521194	0.462064
0.415294	0.380741	0.373118	0.373414	0.460414	0.543912	0.409307	0.452107	0.463179	0.513036	0.340143	0.488981	0.471179	0.45832
0.448571	0.372807	0.419252	0.403542	0.40054	0.660239	0.368931	0.375592	0.364001	0.539564	0.311491	0.472338	0.496656	0.535198
0.469162	0.380788	0.407713	0.406932	0.43127	0.584947	0.355302	0.361954	0.419318	0.51128	0.324006	0.470009	0.500086	0.449674
0.50572	0.402713		0.465281	0.453902	0.603983	0.406133	0.429896	0.395089	0.629424	0.281659	0.419503	0.485185	0.495428
0.51733	0.388672		0.410548	0.428141	0.634125	0.405757	0.443386	0.398964		0.35324	0.47303	0.511567	0.490836
0.455928	0.384448		0.433125	0.413622	0.640456	0.332268	0.34858			0.364059	0.488441	0.481822	0.491513
0.469895	0.430063		0.421267	0.468855	0.595907	0.399866	0.372893			0.321677	0.47126	0.486445	0.449001
0.512549	0.353709		0.466814	0.450492	0.625378	0.402022	0.368889			NaN	0.461163	0.47109	0.527915
0.486626	0.414115		0.432555		0.629938	0.438011	0.408484			0.338215	0.49099	0.508605	0.48379
0.507486	0.448671		0.426132		0.586635	0.361118	0.419179			0.33123	0.492579	0.465268	0.465825
0.56112	0.352297		0.45812		0.624853	0.393411	0.349451			0.3182	0.457615	0.531613	0.526855
0.448928	0.375654		0.452107			0.351082	0.420605			0.352664			0.443171
0.481802	0.356722		0.375592			0.41454	0.388006			0.348827			0.455723
0.509368			0.361954							0.311741			0.464396
0.44626			0.429896							0.363874			0.444362
0.480529			0.443386							0.347687			0.437893
0.467835			0.34858							0.309057			0.400774
0.49958			0.372893										0.464548
0.503359			0.368889										0.486479
0.529669			0.408484										0.478791
0.467608			0.419179										0.492419
0.485664			0.349451										0.496118
0.484409			0.420605										0.41277
0.543516			0.388006										0.509961
0.517347			0.330093										0.480623
0.415845			0.334218										0.553128
0.529742			0.339976										0.520041
0.496704			0.314574										0.569545
0.471972			0.351277										0.5274
0.465597			0.343104										0.497999
0.492461			0.320286										0.506501
0.465921			0.340963										0.498299
0.503404			0.328309										0.496786
0.477555			0.410969										0.547373
0.470626			0.35912										0.521214
0.505775			0.398242										0.550492
0.481919			0.401083										0.618038
0.474906			0.375169										0.636351
0.438546			0.377766										0.567324
0.466854			0.397553										0.567885
0.484903			0.378617										0.578337
0.503445			0.396243										0.483657
0.532946													0.491257
0.517954													0.525514
0.560835													0.460983
0.481278													0.496601
0.51867													0.497539
0.534395													0.530587
0.538617													0.510184
0.502972													0.542039
0.480951													NaN
0.517639													0.507051
0.499275													0.54292
0.462385													0.524947
0.476779													NaN
0.480341
0.547507
0.480879
0.490185
0.485601
0.549325
0.461077
0.472032
0.471175
0.529286

## Sheet: NADHf (uM)
AKSOM	9mM oxa	18.1uM pyr	181uM pyr	1.81mM pyr	11mM AOA	0mM K	2.55mM K	15mM K	1mM cyclo	10uM noco	10uM latA	10uM gram	2mM oua
43.6775	41.8635	39.838	46.2745	50.0657	48.2253	57.6735	77.7133	58.3743	51.0463	44.4644	32.509	42.9396	32.3494
31.364	37.3478	39.8927	43.6358	47.6474	43.9115	58.0051	77.658	52.0478	43.686	50.2517	43.1224	37.5057	29.4042
37.2167	34.7866	35.759	42.255	49.8754	60.4147	56.3597	82.5383	50.3526	44.3193	54.3796	42.0754	42.7768	34.2359
34.0601	32.0858	37.8062	44.7533	42.4225	43.6694	46.0721	73.9035	46.8685	50.162	43.223	36.0799	32.7223	35.7261
39.2154	41.0542	59.5515	57.043	45.8382	49.7197	48.3386	61.542	73.5782	44.0217	49.2203	41.3917	44.0096	33.41
33.9699	36.9197	56.7622	46.2963	43.2726	56.8159	51.5922	62.815	72.7408	37.8935	55.2114	46.9479	35.6768	36.0859
41.9799	35.6262	52.5026	48.3471	47.4274	49.7918	44.5332	56.2227	76.3203	30.5711	42.3022	36.1972	43.1515	39.0712
47.6956	37.4779	56.8646	61.7961	50.1985	50.1577	51.1599	64.7378	64.5276	48.7813	49.7031	42.0763	37.0415	35.4964
39.3495	32.359	55.0964	50.4253	76.1766	67.6807	54.6726	44.8151	37.2425	42.9542	57.7246	38.0726	50.0487	40.7917
44.1399	39.9079	43.6776	57.6221	59.1329	43.7111	54.8852	46.7354	37.0693	37.2733	44.6006	33.0072	42.8125	38.5604
54.0936	30.6144		53.8262	59.6882	64.0216	47.6722	39.7515	36.7225	30.559	47.1997	39.8377	40.8263	37.7473
48.647	31.1438		77.7133	69.1382	58.1585	48.2192	41.0713	34.636		53.5083	41.3343	47.7456	37.5168
52.4342	29.4507		77.658	65.7	54.4849	42.6016	49.4787			64.5203	38.1041	37.6298	26.2144
57.3806	30.4563		82.5383	65.6644	48.0298	43.7188	50.5407			61.6118	45.0164	42.5758	28.7063
40.2542	28.9313		73.9035	67.0151	64.2362	41.3726	47.3751			NaN	41.7541	45.0363	25.5499
39.214	26.5264		61.542		57.282	35.9235	44.0574			61.3788	31.1844	40.2662	27.4758
30.9561	26.6811		62.815		57.0999	57.369	46.9936			73.9428	42.5993	43.4795	23.2997
36.7514	35.1504		56.2227		61.9296	52.662	50.5515			64.5274	34.4469	52.7891	26.1322
24.7092	27.9579		64.7378			43.5874	36.7765			61.3162			24.4609
20.8644	34.1287		44.8151			42.0816	48.1026			66.7229			25.7583
27.2149			46.7354							55.2432			26.8767
37.2058			39.7515							60.1724			23.8327
42.4383			41.0713							60.346			27.438
31.3205			49.4787							58.5			23.7917
40.5952			50.5407										44.1423
31.3896			47.3751										39.1214
36.0499			44.0574										43.2355
42.386			46.9936										42.2482
40.8522			50.5515										43.8075
40.6047			36.7765										28.8634
37.9038			48.1026										56.9794
38.7497			34.0919										55.425
48.5616			37.9589										48.2702
38.6489			33.4459										51.987
39.4628			32.7478										52.0663
39.7702			39.9302										53.2774
54.5497			41.4544										47.6193
54.7194			31.7323										48.0158
60.2199			31.9316										35.2264
59.0455			32.8116										41.418
46.6038			44.5056										43.8962
44.4079			39.372										40.9383
37.8753			54.0726										50.2316
35.2934			35.8292										49.2295
45.8974			38.467										42.2002
49.8406			43.3411										44.19
49.3821			47.4555										58.2514
44.2241			39.0307										44.5145
73.1484			46.3375										53.9037
75.9136													42.1616
71.9177													53.6401
68.4105													48.7258
55.3849													52.3011
58.6314													53.0265
56.7698													55.4588
53.0415													54.5776
39.8996													55.8124
43.6365													NaN
35.5087													55.5003
37.8507													51.7296
42.6906													52.9143
46.6681													NaN
47.8178
37.742
69.2681
65.3132
58.3907
56.0984
69.8875
66.3939
59.6125
56.2211

## Sheet: NADHb (uM)
AKSOM	9mM oxa	18.1uM pyr	181uM pyr	1.81mM pyr	11mM AOA	0mM K	2.55mM K	15mM K	1mM cyclo	10uM noco	10uM latA	10uM gram	2mM oua
25.5141	24.3425	21.1515	24.9124	26.0505	30.5366	31.1383	41.6119	29.6412	30.4965	25.8525	20.3728	24.7861	18.6153
25.2071	22.9762	20.3665	23.4027	25.0267	27.746	28.4506	44.0743	28.5714	29.9472	24.954	26.7091	21.7635	18.1447
23.3629	25.7003	22.1121	23.2576	24.5996	35.8674	28.7791	40.8765	24.7953	27.6194	28.2376	26.2174	23.4817	19.2249
20.7854	26.0484	20.6709	25.8458	25.1267	28.0889	30.0035	37.1858	24.3352	27.5105	26.0607	20.4654	21.6366	20.2509
20.0463	25.0478	28.5978	30.244	26.2116	28.4561	26.2962	35.5098	35.9842	24.7373	26.351	24.0473	23.5799	19.0636
19.1917	26.5189	29.0158	27.6233	24.0728	34.9397	28.9588	32.4503	37.8129	21.6785	27.9826	27.5978	20.3633	20.3215
29.3986	24.8634	29.102	27.2247	26.5861	30.1444	24.2203	32.7042	37.4677	19.1511	26.4764	21.4796	27.2111	21.7453
31.5833	22.6661	28.333	33.3611	27.0437	29.7154	28.579	31.349	34.3795	27.3936	25.0091	24.6747	25.3171	20.8046
25.5154	21.9338	27.816	37.8407	35.1884	39.4475	28.2527	24.9844	23.3343	25.2197	26.4186	22.249	27.9663	22.623
27.6028	21.5764	25.9508	33.2027	33.4549	26.1765	27.8932	25.9745	21.399	22.4586	25.3481	21.1384	26.4264	21.4871
25.0511	18.448		33.6037	31.5639	37.8613	26.2579	25.5895	22.1785	19.0471	26.9325	24.4584	23.67	20.086
25.9577	19.1065		41.6119	33.9579	33.2307	27.3967	23.7376	22.1689		28.5096	24.4297	25.3988	21.7333
28.9636	19.4413		44.0743	35.7276	30.9093	24.8564	26.836			33.4776	21.5659	21.5532	15.0528
31.9977	19.2027		40.8765	34.0325	27.8283	23.7475	26.2191			31.2803	28.3774	25.3819	16.3802
24.55	17.4082		37.1858	32.491	36.4181	24.0923	27.15			NaN	24.8557	27.8668	14.2992
22.7727	15.7949		35.5098		29.915	24.5877	24.1506			32.937	17.8729	23.0711	15.894
21.4989	16.5218		32.4503		33.7577	31.6588	26.0968			37.3042	25.1224	25.2941	13.5133
21.0996	20.0987		32.7042		37.5254	28.2567	29.4669			33.1571	20.6515	27.5175	15.6739
15.0235	16.005		31.349			25.0294	21.3573			31.2451			14.9203
13.8724	19.4707		24.9844			23.4327	26.2063			33.9483			15.5904
15.6212			25.9745							29.3633			15.6753
22.7406			25.5895							31.6342			15.522
22.7434			23.7376							34.8921			16.7024
18.5181			26.836							29.8944			16.0532
23.0099			26.2191										28.2826
19.8118			27.15										24.0984
20.65			24.1506										26.3895
23.3743			26.0968										26.0486
21.7882			29.4669										24.472
21.4109			21.3573										21.1515
23.3022			26.2063										34.7105
22.6651			20.9045										31.966
23.6607			22.7163										28.1836
23.3415			21.168										31.2196
21.1367			20.0151										26.8734
22.5129			23.7										30.0186
32.8036			23.7263										26.9873
30.7194			19.8912										29.6259
34.5798			19.4992										20.8296
31.3795			19.2332										26.3708
27.4679			22.9718										25.6294
25.5118			22.2523										24.1151
22.567			30.0871										27.6208
20.1512			20.576										25.7015
25.2033			23.2488										20.409
27.8176			24.2554										26.8784
25.2292			26.0227										30.9512
25.7556			22.3899										23.7348
42.939			26.5055										32.371
41.7018													25.3405
40.8171													31.9843
39.8475													28.7811
31.3772													30.4944
30.8432													29.7396
29.6127													32.0676
29.6244													31.1732
21.8221													30.0438
24.6006													NaN
20.9228													31.1545
22.7837													28.4081
25.2478													30.0095
25.3321													NaN
25.4014
22.7627
38.6419
32.9255
32.4736
30.7949
40.0878
33.4751
32.884
31.4657

## Sheet: equilibrium long lifetime (ns)
AKSOM	9mM oxa	18.1uM pyr	181uM pyr	1.81mM pyr	11mM AOA	0mM K	2.55mM K	15mM K	1mM cyclo	10uM noco	10uM latA	10uM gram	2mM oua
2.35366	2.48112	2.51337	2.58796	2.54708	2.28111	2.50132	2.47593	2.42099	2.50492	2.22063	2.28489	2.48658	2.50885
2.36811	2.58914	2.48328	2.57599	2.57607	2.28555	2.45126	2.40549	2.52801	2.60935	2.29756	2.254	2.42944	2.52108
2.56205	2.47268	2.49964	2.48096	2.58866	2.2678	2.47338	2.44025	2.57565	2.66543	2.32192	2.26247	2.95987	2.55868
2.31843	2.44526	2.5319	2.62808	2.62013	2.30463	2.49873	2.60958	2.45723	2.37441	2.36219	2.38465	2.85816	2.46571
2.42335	2.47489	2.47593	2.42102	2.55635	2.38185	2.47475	2.53719	2.70552	2.4493	2.54029	2.36356	3.09047	2.51901
2.4878	2.4768	2.45901	2.38926	2.42561	2.31266	2.45768	2.45321	2.46547	2.46605	2.26281	2.22861	2.46955	2.44445
2.19901	2.53974	2.3839	2.44535	2.51124	2.42069	2.51051	2.51505	2.55977	2.678	2.2851	2.43807	3.06301	2.55006
2.20902	2.7031	2.48591	2.43993	2.6069	2.52945	2.50134	2.57735	2.52093	2.37441	2.36963	2.25744	2.53473	2.44065
2.38867	2.48464	2.4332	2.41905	2.45897	2.53901	2.458	2.55937	2.4628	2.4493	2.06628	2.2253	2.44026	2.35207
2.34094	2.55455	2.40331	2.45009	2.44408	2.49702	2.3849	2.46882	2.39907	2.46605	2.31113	2.49321	2.88475	2.36991
2.66579	2.46024		2.6413	2.5199	2.46633	2.38814	2.46845	2.38824	2.678	2.12732	2.36977	2.37683	2.43137
2.56974	2.60396		2.47593	2.45948	2.44549	2.40445	2.58015	2.50056		2.07978	2.30903	2.40349	2.50413
2.29245	2.61057		2.40549	2.41745	2.38718	2.51874	2.46635			2.43482	2.39185	2.9634	2.4463
2.39763	2.66062		2.44025	2.54331	2.32082	2.63145	2.51116			2.41739	2.32347	2.6495	2.35387
2.26445	2.46337		2.60958	2.52201	2.28669	2.69323	2.4845			NaN	2.30346	3.0124	2.45723
2.49363	2.60914		2.53719		2.32648	2.71644	2.53093			2.35812	2.84582	2.66536	2.37927
2.47832	2.60371		2.45321		2.36557	2.4208	2.45819			2.46381	2.3999	2.48209	2.38962
2.5223	2.45719		2.51505		2.29476	2.409	2.36671			2.44648	2.2698	2.94378	2.47239
2.41365	2.51936		2.57735			2.43054	2.3678			2.38001			2.47318
2.43297	2.46874		2.55937			2.69812	2.3869			2.45243			2.46049
2.68219			2.46882							2.38065			2.49922
2.30629			2.46845							2.45885			2.52522
2.382			2.58015							2.42419			2.51091
2.50225			2.46635							2.38745			2.46859
2.4565			2.51116										2.32718
2.43479			2.4845										3.09789
2.52553			2.53093										2.48399
2.41671			2.45819										2.54231
2.47562			2.36671										2.58922
2.51228			2.3678										2.53576
2.5929			2.3869										2.47729
2.61973			2.44321										2.40675
2.92958			2.52902										2.35868
2.77128			2.38802										2.4843
2.6458			2.49113										2.58775
2.56395			2.35606										2.57246
2.37188			2.51569										2.5345
2.34332			2.38016										2.56495
2.41013			2.6144										2.98431
2.43181			2.58852										2.51039
2.44993			2.65856										2.52749
2.37828			2.52906										2.52722
2.48436			2.56209										2.63005
2.4348			2.53727										2.75846
2.55743			2.54702										2.84868
2.41592			2.45808										2.56295
2.56			2.61611										2.69473
2.4924			2.5065										2.89731
2.39502			2.58935										2.37364
2.41316													2.43957
2.47328													2.39717
2.46738													2.6046
2.62691													2.41175
2.51987													2.42067
2.51867													2.64799
2.52242													2.50698
2.43103													2.50357
2.37076													NaN
2.47366													2.38359
2.40049													2.54549
2.48849													2.49456
2.52778													NaN
2.53619
2.60842
2.40953
2.48157
2.48864
2.48924
2.40953
2.48157
2.48864
2.48924

## Sheet: equilirbium bound ratio
AKSOM	9mM oxa	18.1uM pyr	181uM pyr	1.81mM pyr	11mM AOA	0mM K	2.55mM K	15mM K	1mM cyclo	10uM noco	10uM latA	10uM gram	2mM oua
0.365195	0.327899	0.301891	0.302674	0.333032	0.41655	0.342974	0.308179	0.331069	0.343906	0.355009	0.35131	0.378559	0.356957
0.426153	0.36195	0.280701	0.29076	0.356859	0.449306	0.292734	0.339217	0.306404	0.353571	0.310168	0.384641	0.363962	0.33232
0.352692	0.319052	0.275933	0.318581	0.337557	0.489682	0.310269	0.324111	0.30262	0.37335	0.328639	0.383212	0.362147	0.368812
0.438799	0.344361	0.28506	0.298112	0.341411	0.473487	0.335239	0.29168	0.325043	0.370508	0.31941	0.314615	0.211358	0.35023
0.421988	0.329358	0.291501	0.357943	0.346103	0.479777	0.302111	0.281193	0.305083	0.340366	0.321267	0.362828	0.382821	0.329735
0.377895	0.336168	0.283679	0.367566	0.35653	0.544755	0.332739	0.315399	0.31031	0.388899	0.368387	0.387514	0.38533	0.352367
0.465476	0.32817	0.299022	0.34772	0.366908	0.459843	0.305837	0.311262	0.310753	0.320006	0.329052	0.312958	0.326714	0.335814
0.417266	0.294267	0.324376	0.353618	0.350426	0.380507	0.308141	0.283892	0.324616	0.370508	0.322777	0.354366	0.314491	0.341189
0.42049	0.348609	0.327146	0.362522	0.292446	0.435275	0.281199	0.330398	0.323024	0.340366	0.477744	0.390201	0.336919	0.377362
0.402928	0.318797	0.341934	0.333537	0.335571	0.4052	0.288036	0.302019	0.349148	0.388899	0.332343	0.309348	0.35071	0.340404
0.311279	0.36334		0.306799	0.328797	0.418865	0.329349	0.343299	0.320109	0.320006	0.387753	0.325536	0.38924	0.367882
0.362425	0.264767		0.308179	0.313067	0.4373	0.312709	0.323427	0.337373		0.445248	0.368782	0.352016	0.37867
0.444874	0.321311		0.339217	0.360645	0.450096	0.31571	0.324767			0.305147	0.318768	0.218476	0.399478
0.464422	0.300632		0.324111	0.335448	0.466646	0.314392	0.328424			0.345288	0.343556	0.301402	0.407625
0.396626	0.324005		0.29168	0.323155	0.429422	0.330822	0.309847			NaN	0.366296	0.325581	0.414683
0.315773	0.318591		0.281193		0.479804	0.278925	0.343778			0.376936	0.326684	0.327675	0.431183
0.315339	0.332846		0.315399		0.407042	0.332637	0.351701			0.313217	0.318466	0.347806	0.445211
0.31893	0.348763		0.311262		0.463672	0.336516	0.33227			0.341475	0.381215	0.202861	0.457229
0.366908	0.351039		0.283892			0.362699	0.36594			0.32683			0.410524
0.3961	0.353556		0.330398			0.29429	0.344347			0.333235			0.358056
0.353834			0.302019							0.338986			0.366699
0.336015			0.343299							0.357373			0.358661
0.329074			0.323427							0.331747			0.336993
0.343812			0.324767							0.335834			0.33779
0.328839			0.328424										0.405312
0.345934			0.309847										0.232671
0.336169			0.343778										0.328213
0.376534			0.351701										0.359088
0.342863			0.33227										0.276441
0.317836			0.36594										0.314791
0.293832			0.344347										0.332507
0.366614			0.367297										0.341405
0.365837			0.357557										0.511465
0.338282			0.36672										0.312581
0.337247			0.319255										0.343594
0.342126			0.363066										0.399409
0.346188			0.330939										0.347612
0.349709			0.345542										0.34996
0.319349			0.325437										0.357487
0.348391			0.296414										0.378981
0.33897			0.280144										0.356485
0.343749			0.284663										0.374294
0.350187			0.268102										0.285788
0.322462			0.323013										0.30046
0.305194			0.31483										0.30825
0.322919			0.312477										0.329913
0.288822			0.289003										0.312365
0.325368			0.314986										0.295463
0.360375			0.312716										0.403889
0.346653													0.40217
0.332703													0.388853
0.325873													0.35542
0.297983													0.352834
0.341397													0.363526
0.314507													0.322084
0.343741													0.32653
0.34073													0.320741
0.366298													NaN
0.338182													0.354295
0.34266													0.318235
0.32815													0.316121
0.319547													NaN
0.279384
0.329981
0.328084
0.294453
0.319202
0.326462
0.328084
0.294453
0.319202
0.326462
