# Supplementary material for: A coarse-grained NADH redox model enables inference of subcellular metabolic fluxes from fluorescence lifetime imaging
Source: eLife. 2021 Nov 22;10:e73808. doi: 10.7554/eLife.73808 (PMC8935353; doi:10.7554/eLife.73808)
Supplement: Figure 8—source data 1. [file elife-73808-fig8-data1.xlsx]

## Sheet: rox (per second)
AKSOM	9mM oxa	18.1uM pyr	181uM pyr	1.81mM pyr	11mM AOA	0mM K	2.55mM K	15mM K	1mM cyclo	10uM noco	10uM latA	10uM gram	2mM oua
1.19182	1.37972	1.24658	1.28092	1.01793	1.31146	1.06946	1.23897	0.960202	1.37829	1.24332	1.61545	1.12509	1.26817
2.08524	1.37973	1.24897	1.33553	0.915844	1.17495	1.07541	1.25214	1.31812	1.808	1.03774	1.35362	1.20911	1.64577
1.50516	2.29113	1.86381	1.25974	0.846845	0.844327	1.0902	0.943297	1.03148	1.37092	1.06554	1.40068	NaN	1.14719
0.935065	2.5896	1.42437	1.51974	1.36552	1.13639	1.72029	1.16663	1.05484	0.968407	1.48622	1.49157	2.30826	1.25123
0.484872	1.52826	1.03099	0.941815	1.2266	0.790715	1.31468	1.60785	1.01287	1.2103	1.16746	1.26724	NaN	1.39578
1.0223	2.07717	1.25556	1.24834	1.09159	0.727711	1.2424	1.0982	1.14436	1.00743	0.845133	1.15895	1.07069	1.23512
1.27949	2.01434	1.40161	1.17392	1.05401	1.01184	1.29516	1.47248	0.980826	1.7105	1.55795	1.66953	NaN	1.28392
1.33396	1.69327	0.969056	1.02097	1.02378	1.27464	1.36144	1.09528	1.14052	0.912286	1.02049	1.35369	1.93315	1.42356
1.24763	1.79014	0.981297	2.11776	0.936215	1.02761	1.27951	1.2354	1.26707	1.26098	0.182733	1.10963	1.21815	1.02953
1.21247	1.20535	1.3917	1.32383	1.26112	1.23685	1.19546	1.38175	0.889315	1.16809	1.27917	1.97472	NaN	1.26121
0.824978	1.3028		1.72825	1.09523	1.10484	1.2046	1.63913	1.17832	1.57447	1.06068	1.71321	1.10181	0.968627
0.936646	1.90244		1.23897	0.983457	0.943863	1.38872	1.38412	1.25016		0.658357	1.28114	1.02521	1.15365
0.578972	1.85295		1.25214	1.01234	0.875254	1.45741	1.18214			1.15615	1.46099	1.81809	1.07547
0.505643	1.80171		0.943297	1.00164	0.87446	1.24319	1.03487			0.941977	1.70409	1.58103	0.983773
1.15651	1.51635		1.16663	0.893153	0.961049	1.37132	1.4328			NaN	1.3274	NaN	0.866622
1.44136	1.51568		1.60785		0.544132	2.21252	1.11106			0.950427	1.45262	1.33558	0.889686
2.07124	1.5589		1.0982		1.16118	0.852481	0.766128			1.05762	1.61195	1.29366	0.837461
1.39608	1.21194		1.47248		1.00102	0.761587	1.0085			0.985981	1.2648	1.63416	0.857097
1.31903	1.20536		1.09528			0.809904	0.825925			1.02653			1.16836
1.49311	1.1805		1.2354			1.08978	0.765672			0.996587			1.41892
1.21232			1.38175							1.08037			1.25981
1.497			1.63913							0.981115			1.67947
1.12592			1.38412							1.32244			1.55293
1.35443			1.18214							0.996433			1.92043
1.29362			1.03487										1.36153
1.55735			1.4328										2.17351
1.2866			1.11106										1.63352
0.958138			0.766128										1.48729
1.04856			1.0085										1.60699
1.14615			0.825925										2.40246
1.75593			0.765672										1.59438
1.19078			1.36308										1.36661
0.661527			1.34488										0.465766
1.46022			1.4863										1.64489
1.07892			1.6394										1.0044
1.21834			1.27494										0.975366
1.38679			1.34358										1.28447
1.15069			1.57342										1.54102
1.38544			1.59611										1.37692
0.995022			1.61411										1.49916
1.36063			1.31575										1.32436
1.25315			1.57472										1.24153
1.33721			1.62926										1.50691
1.35482			1.40817										1.2793
1.32522			1.60972										1.02241
1.28006			1.39586										1.59583
1.20915			1.44388										1.25845
1.39878			1.44614										1.3613
1.2329			1.44923										1.14913
1.10154													1.17297
1.27929													1.21126
1.39752													1.3524
1.46092													1.326
1.00459													1.14358
1.12586													1.47085
1.16702													1.40383
1.12091													1.25051
1.07309													NaN
1.36837													1.19973
1.41289													1.32788
1.4326													1.44357
1.21345													NaN
1.37192
1.4882
1.24848
1.13933
1.28733
1.21109
1.25351
1.04018
1.17356
1.11992

## Sheet: jox (uM per second)
AKSOM	9mM oxa	18.1uM pyr	181uM pyr	1.81mM pyr	11mM AOA	0mM K	2.55mM K	15mM K	1mM cyclo	10uM noco	10uM latA	10uM gram	2mM oua
52.0556	57.7598	49.6614	59.2739	50.9632	63.2456	61.6797	96.2845	56.0511	70.3567	55.2836	52.5166	48.3109	41.0247
65.4016	51.5298	49.8247	58.277	43.6376	51.5941	62.379	97.2391	68.6052	78.9843	52.1479	58.3714	45.3485	48.3926
56.0169	79.7006	66.6481	53.2303	42.2367	51.0097	61.4434	77.8581	51.9377	60.7583	57.9438	58.9342	NaN	39.2752
31.8484	83.0895	53.8501	68.0134	57.9289	49.6254	79.2573	86.2182	49.4389	48.5772	64.2388	53.8157	75.5315	44.7016
19.0145	62.7414	61.3971	53.724	56.2253	39.3141	63.5499	98.9503	74.5249	53.2792	57.4625	52.4533	NaN	46.6332
34.7273	76.6887	71.2685	57.7937	47.2361	41.3456	64.0981	68.9834	83.2418	38.175	46.661	54.4103	38.1987	44.5704
53.7131	71.7633	73.5882	56.7556	49.9891	50.3814	57.6776	82.7865	74.8569	52.2919	65.9045	60.4321	NaN	50.1642
63.624	63.4603	55.105	63.0922	51.3921	63.9329	69.6512	70.9062	73.5952	44.5025	50.7217	56.9582	71.6067	50.5312
49.0937	57.927	54.0659	106.788	71.3177	69.5493	69.9539	55.3647	47.1887	54.1644	10.5482	42.2465	60.967	41.9964
53.5183	48.103	60.7863	76.2819	74.5739	54.0642	65.6131	64.5767	32.9663	43.5386	57.0518	65.1798	NaN	48.6327
44.6261	39.8846		93.0254	65.3725	70.7336	57.4259	65.158	43.271	48.1143	50.0639	68.2504	44.9828	36.563
45.5651	59.2491		96.2845	67.9945	54.8937	66.963	56.8477	43.3005		35.2276	52.9551	48.9495	43.2812
30.3579	54.5706		97.2391	66.5107	47.6881	62.0881	58.4905			74.595	55.6698	68.4146	28.1927
29.0141	54.8734		77.8581	65.7721	42.0001	54.3509	52.303			58.0369	76.7118	67.3136	28.2404
46.5545	43.8701		86.2182	59.8548	61.7342	56.7353	67.8791			NaN	55.4244	NaN	22.1421
56.5215	40.2055		98.9503		31.169	79.4815	48.9503			58.336	45.299	53.7789	24.4449
64.1174	41.5931		68.9834		66.3031	48.906	36.0031			78.2032	68.6681	56.2478	19.5126
51.3081	42.6		82.7865		61.9927	40.1067	50.9812			63.6227	43.5684	86.266	22.3979
32.5922	33.6994		70.9062			35.3016	30.3746			62.9432			28.5791
31.1527	40.289		55.3647			45.8596	36.8308			66.4952			36.549
32.9931			64.5767							59.6833			33.8594
55.6969			65.158							59.0361			40.0264
47.7822			56.8477							79.804			42.6093
42.4214			58.4905							58.2913			45.6904
52.5146			52.303										60.101
48.8847			67.8791										85.0308
46.3817			48.9503										70.6263
40.6116			36.0031										62.8353
42.8358			50.9812										70.3982
46.5388			30.3746										69.3431
66.5566			36.8308										90.8466
46.1421			46.4699										75.7444
32.1248			51.0502										22.4826
56.4359			49.7106										85.5132
42.5772			53.6869										52.2956
48.4537			50.9086										51.9649
75.6493			55.6971										61.1658
62.9651			49.9284										73.9932
83.4313			50.9663										48.504
58.7516			52.9617										62.0924
63.4103			58.5583										58.1345
55.6496			61.9999										50.8263
50.6471			88.0984										75.6945
47.8164			50.4536										62.9794
60.8241			61.921										43.1459
63.7989			60.4981										70.5195
59.7104			68.52										73.3063
61.8597			56.4439										60.5976
90.1847			67.1537										61.9422
83.6216													49.4542
92.0039													64.972
95.6052													65.8968
80.913													69.351
58.9007													60.6399
63.9149													81.5715
61.9004													76.618
44.7237													69.7942
46.8259													NaN
48.5892													66.5854
53.4788													68.6908
61.1584													76.3856
56.6296													NaN
65.6022
56.1677
86.4798
74.4133
75.1681
67.94
87.605
69.0618
69.959
62.963

## Sheet: ocr (fmol per sec per oocyte)
AKSOM	9mM oxa	18.1uM pyr	181uM pyr	1.81mM pyr	0mM K	2.5mM K	1mM cyclo	10uM noco	2.4-10uM latA
2.7428	2.639	2.5581	2.9284	2.5503	2.6742	2.5827	2.5339	2.9407	3.2007
2.6298	2.5724	2.3139	2.5827	2.3847	2.5211	2.9284	2.3854	2.9129	3.3569
2.9331					2.5555		2.4788	3.0284	3.6226
2.8472							2.5441		2.7213
2.7184									2.4401
									2.621
