# Supplementary material for: A coarse-grained NADH redox model enables inference of subcellular metabolic fluxes from fluorescence lifetime imaging
Source: eLife journal article supplement (doi:10.7554/elife.73808), 2021-11-22

NADH image

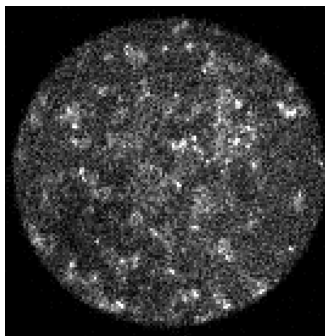

Pixel  
classification

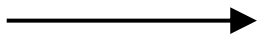

Mitochondrial probability

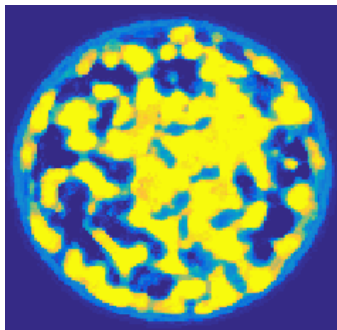

Thresholding  
 $P > 0.7$

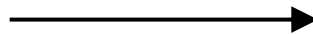

NADH-based segmentation

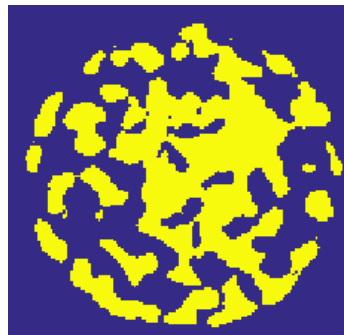

Overlay

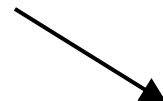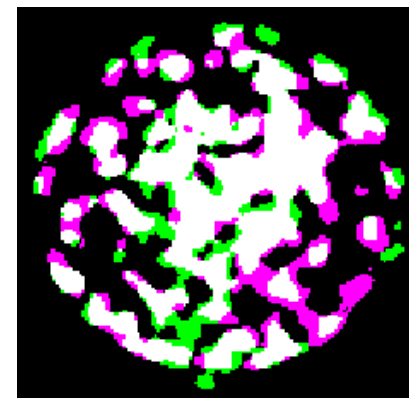

MitoTracker image

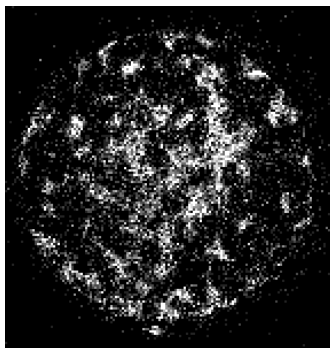

Thresholding  
intensity above  
60 percentile

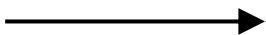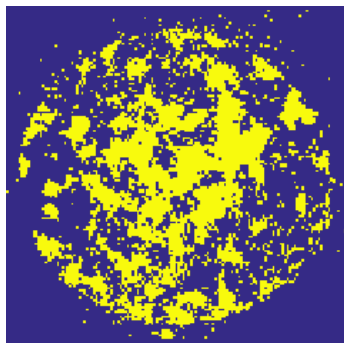

Gaussian blur

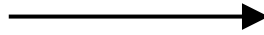

MitoTracker-based segmentation

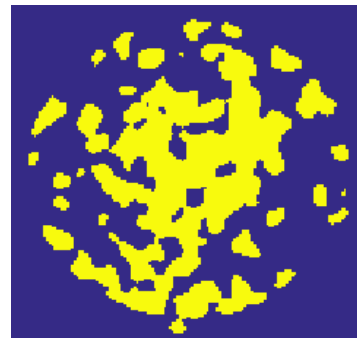

Supplement: supp [file elife-73808-supp-v1.zip]
