# Supplementary figures and images for: A coarse-grained NADH redox model enables inference of subcellular metabolic fluxes from fluorescence lifetime imaging
Source: eLife journal article supplement (doi:10.7554/elife.73808), 2021-11-22

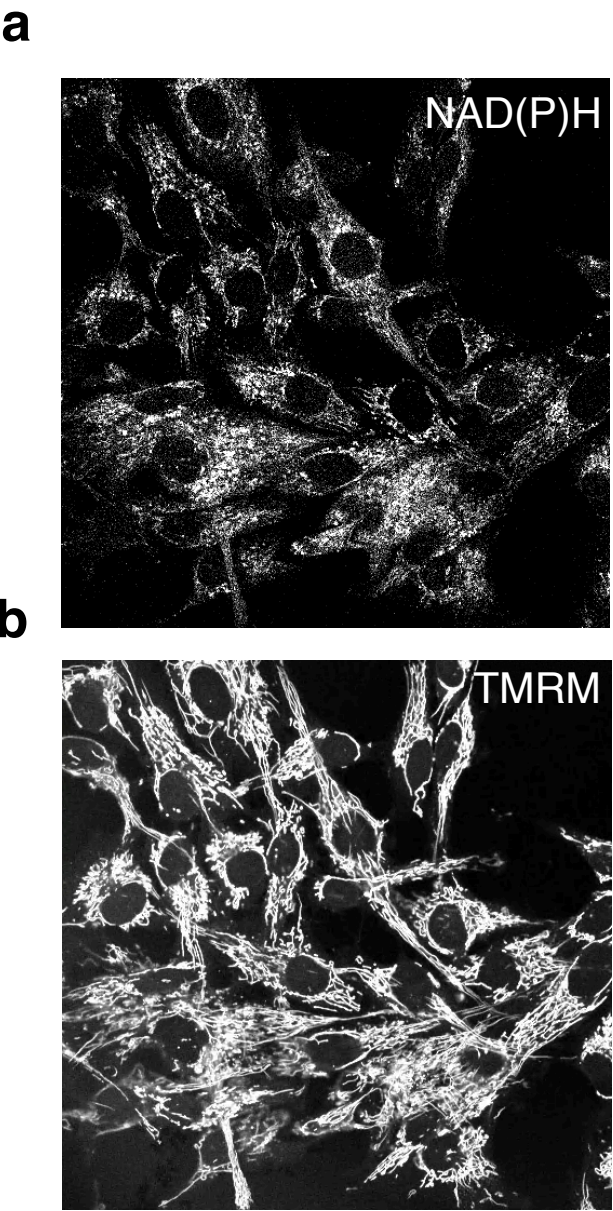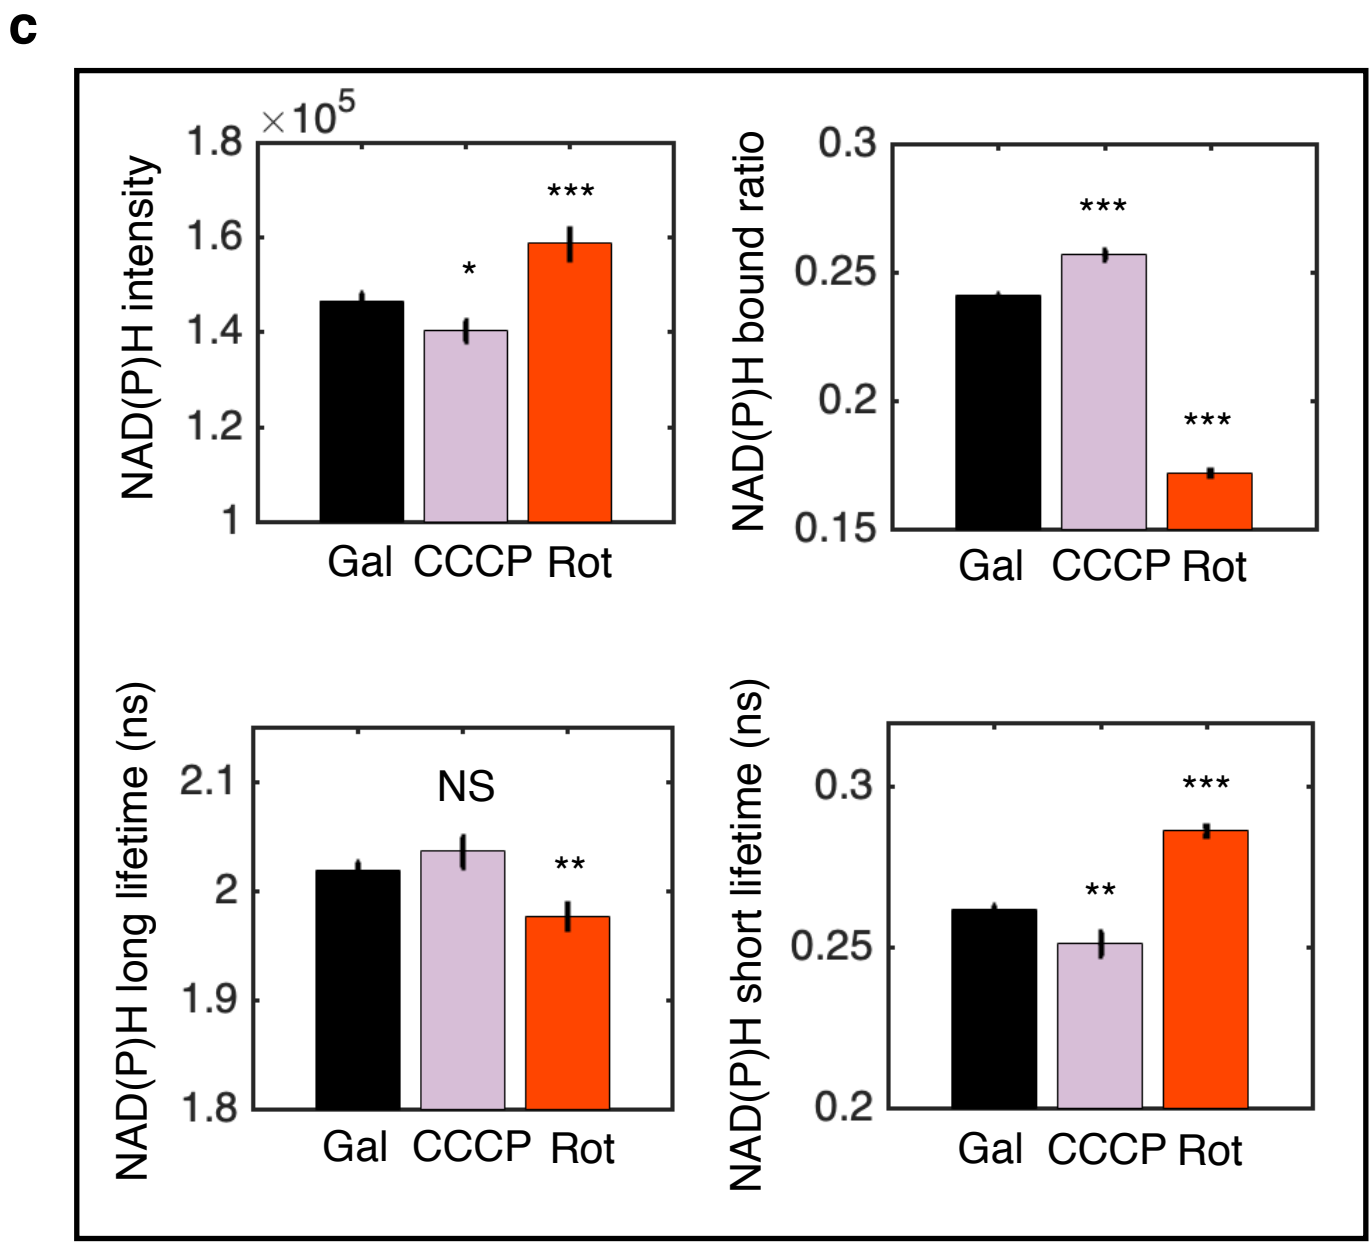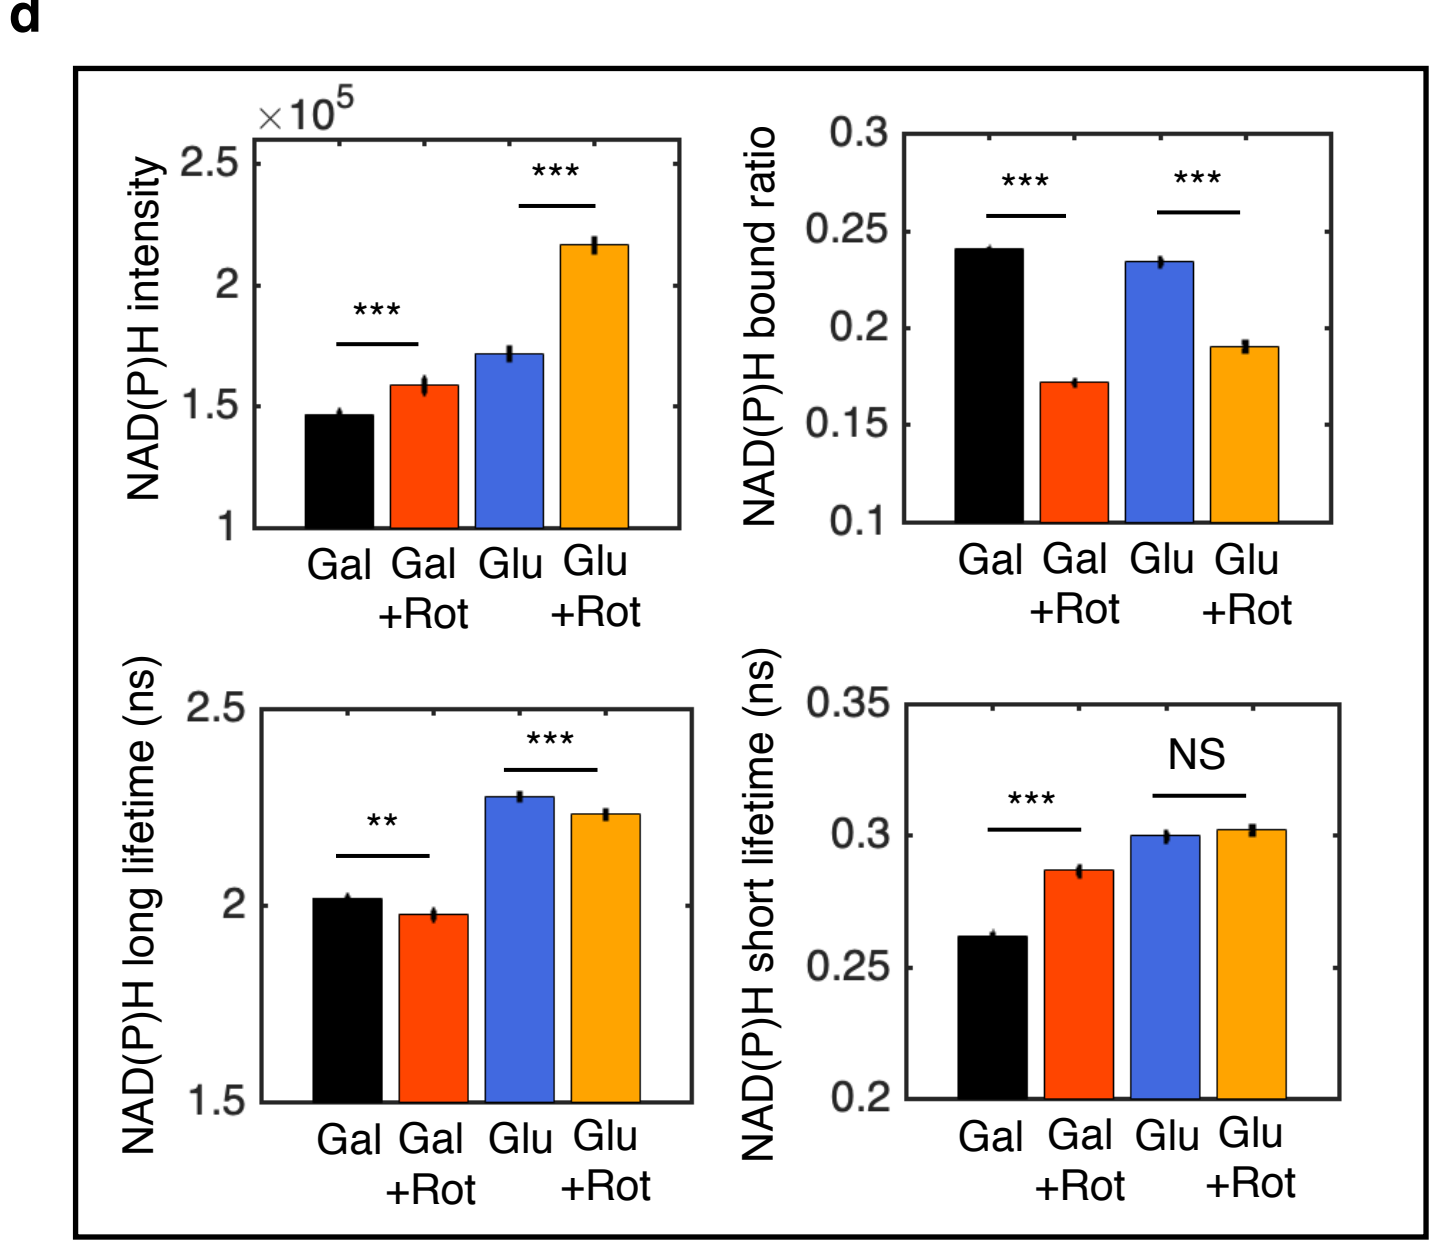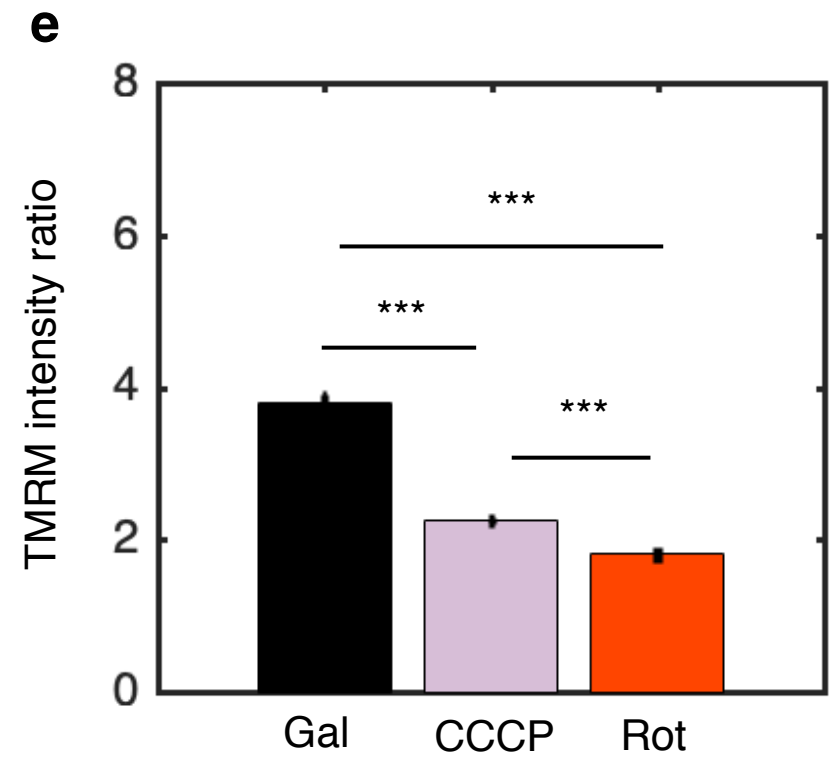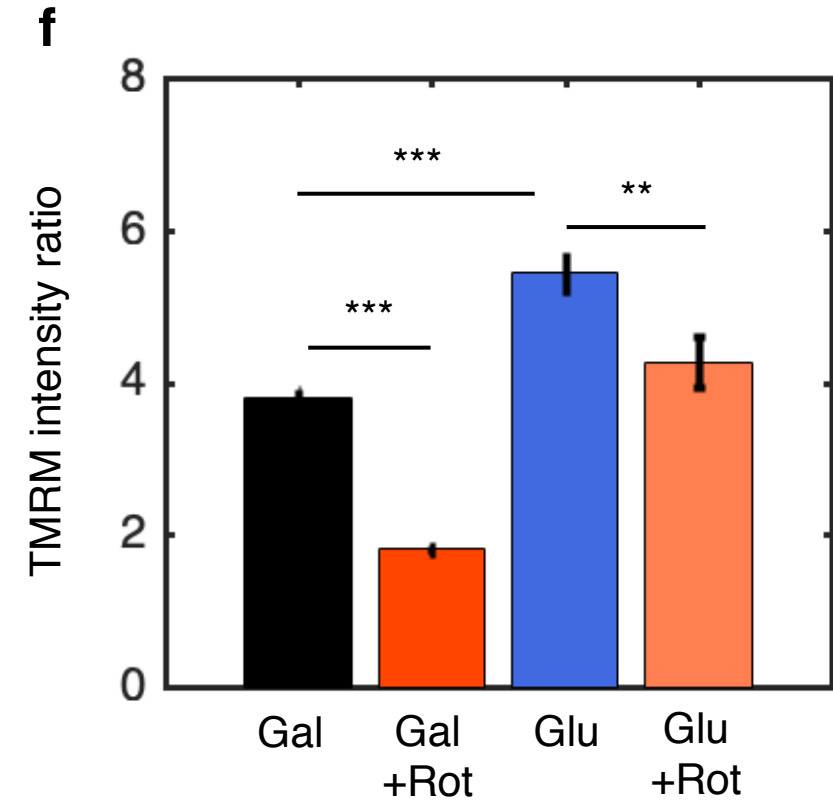

Supplement: supp [file elife-73808-supp-v1.zip]

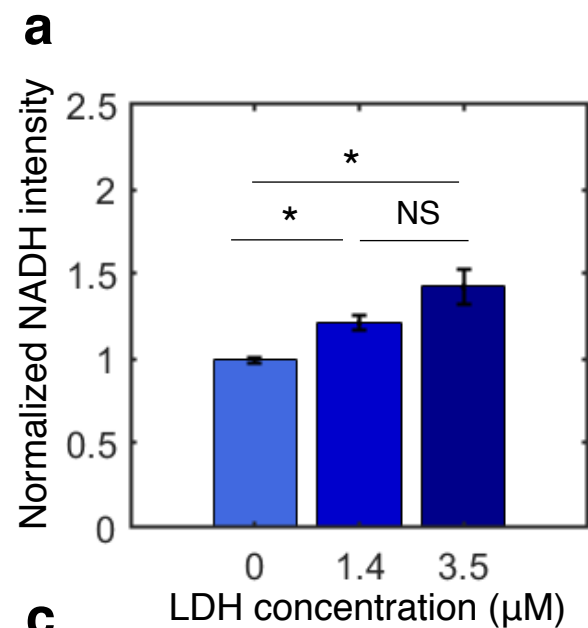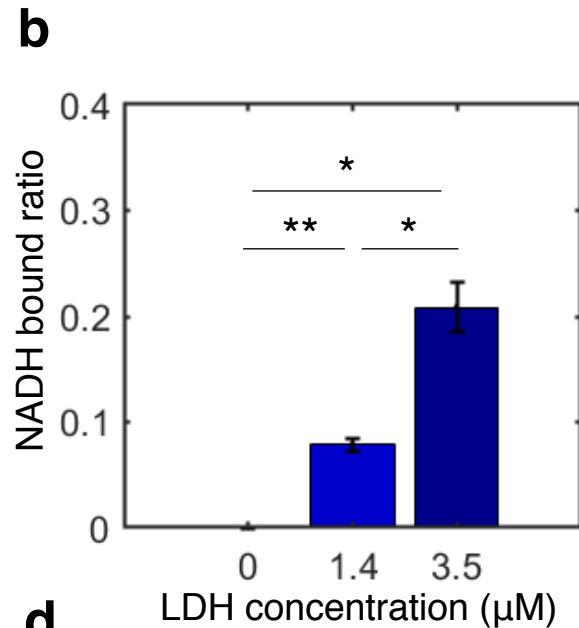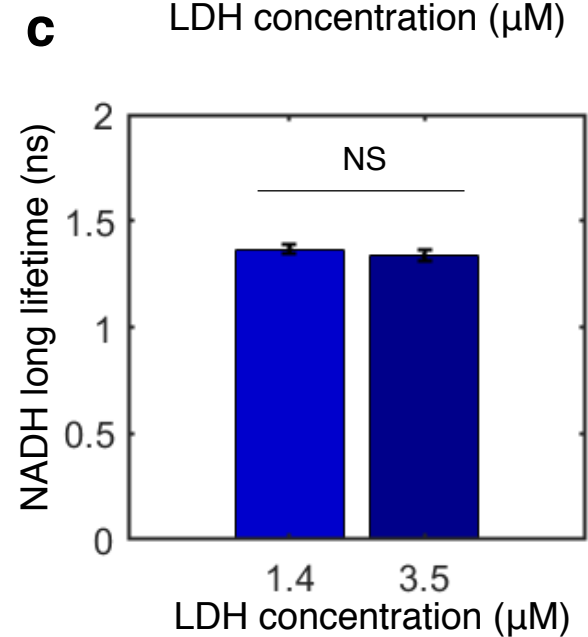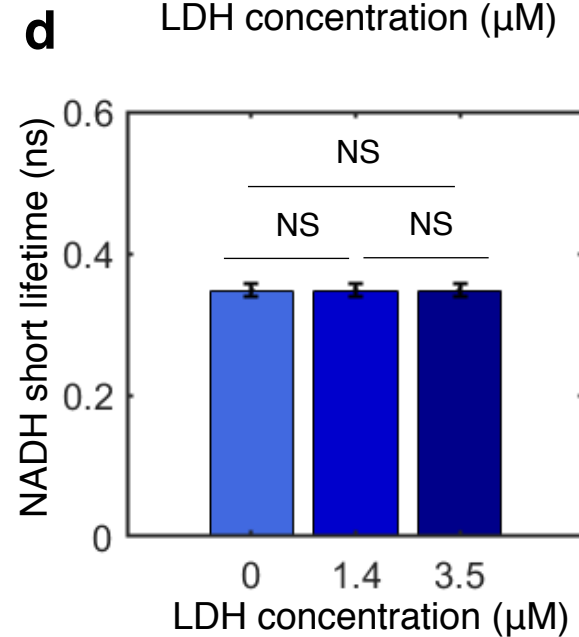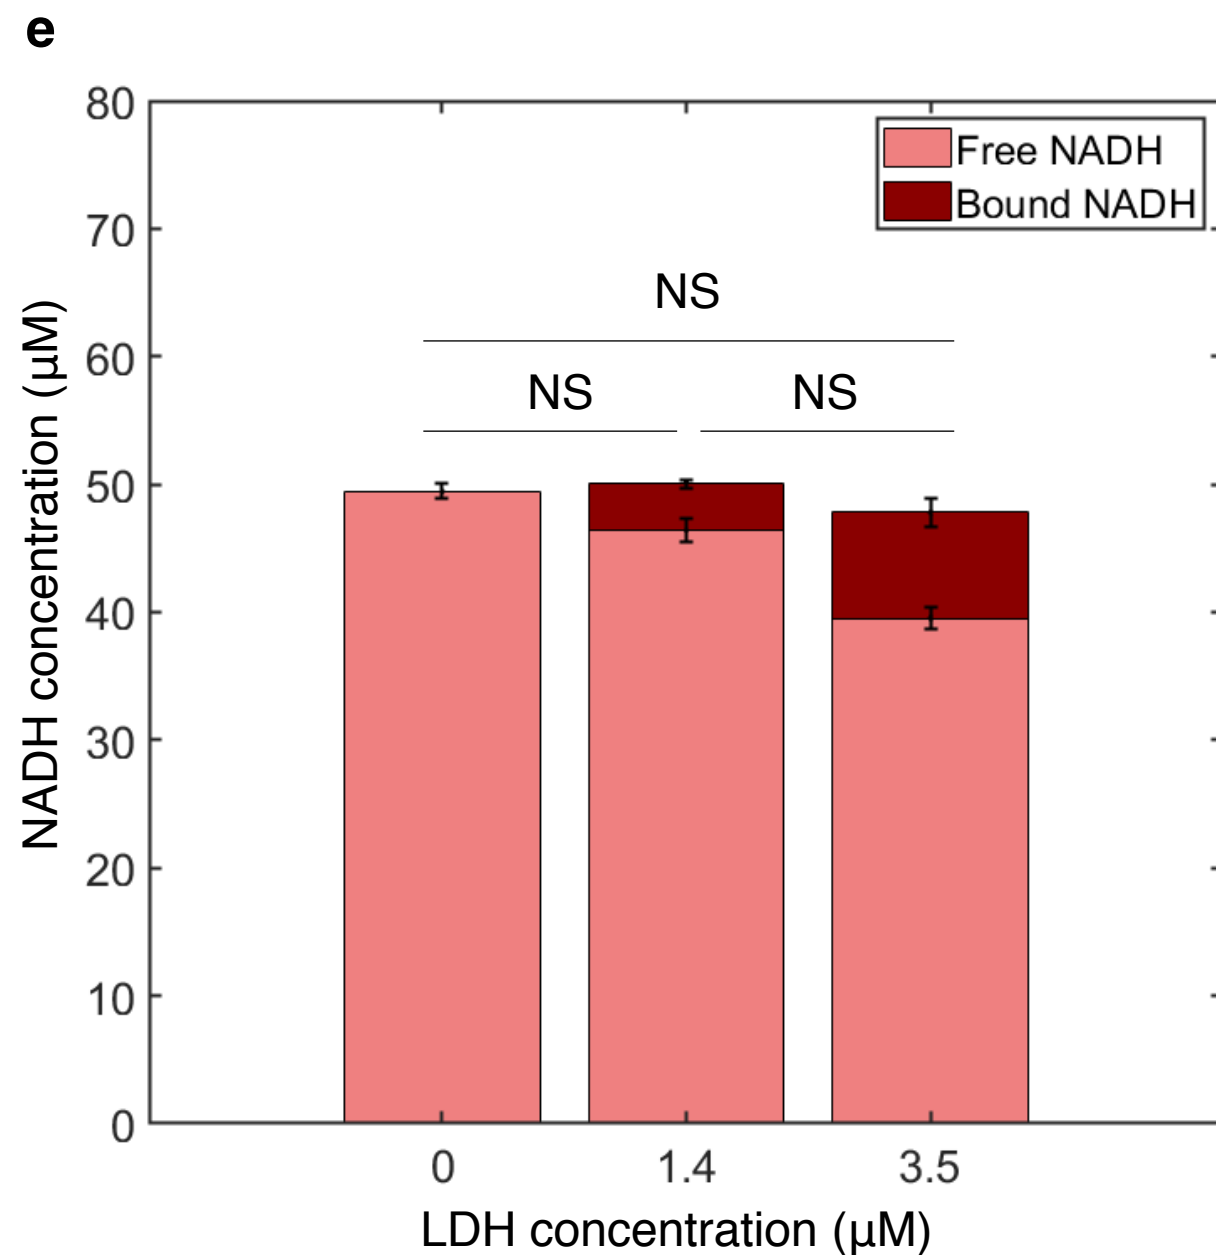

Supplement: supp [file elife-73808-supp-v1.zip]

**a**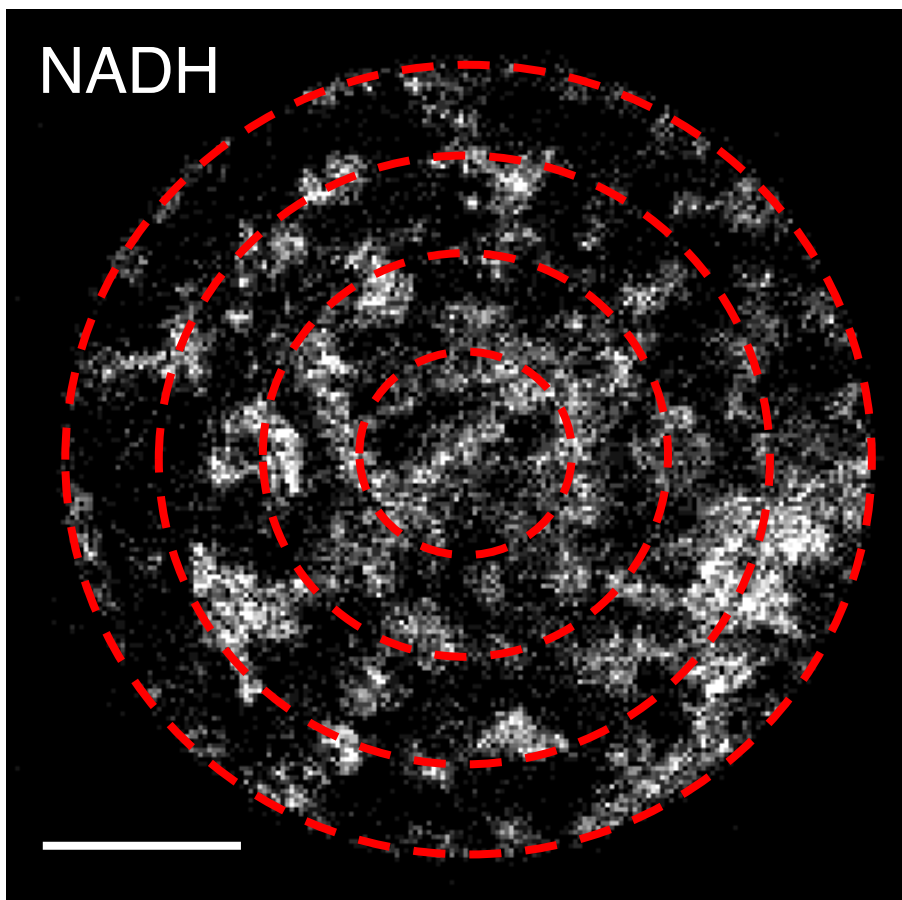**b**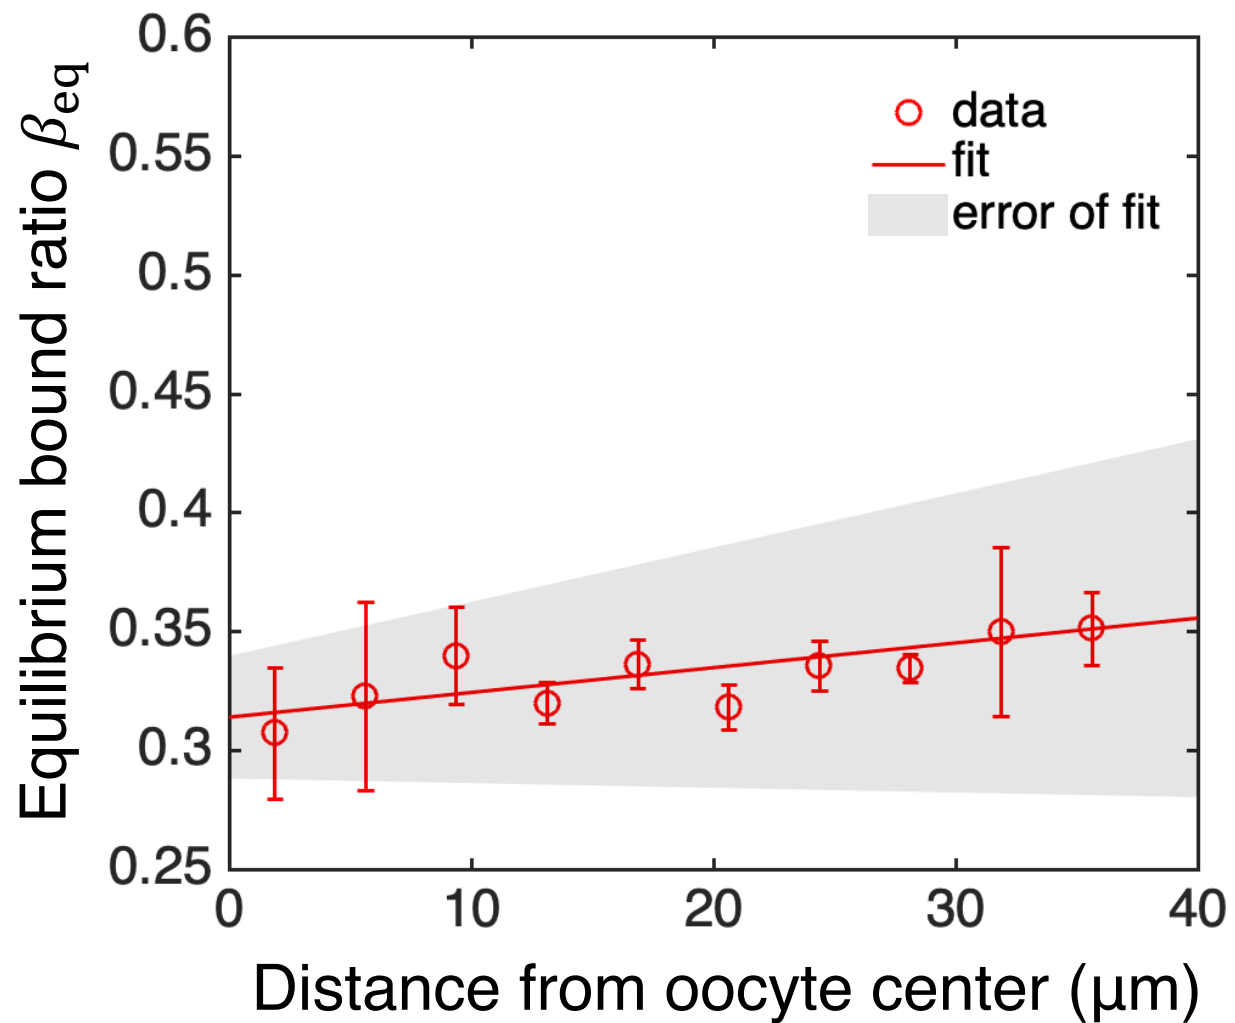

Supplement: supp [file elife-73808-supp-v1.zip]

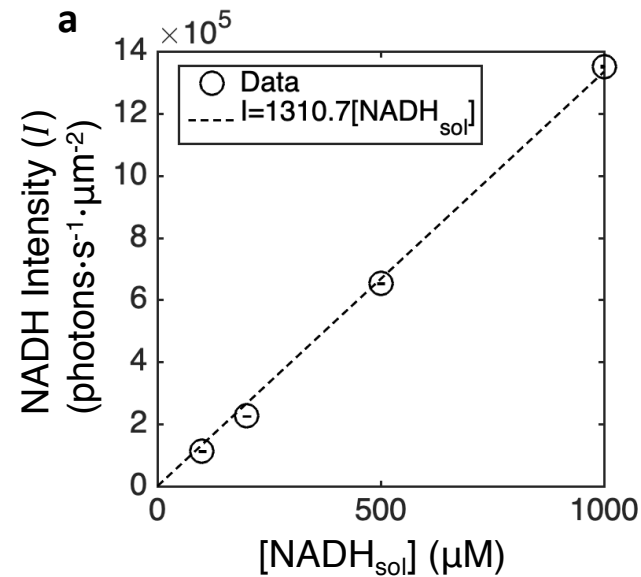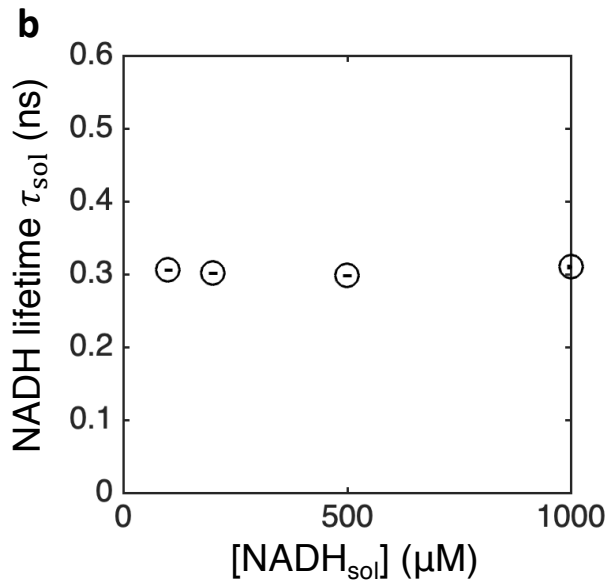

Supplement: supp [file elife-73808-supp-v1.zip]

**a**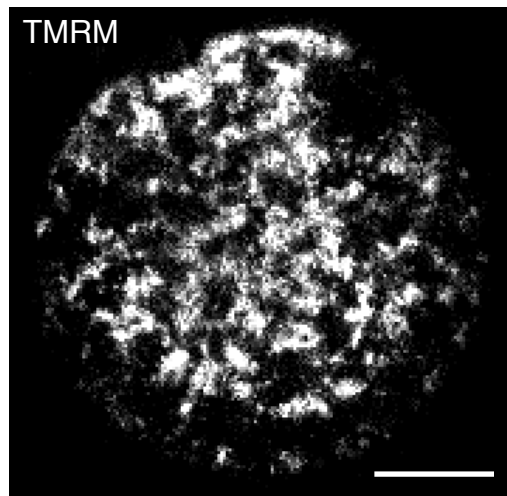**b**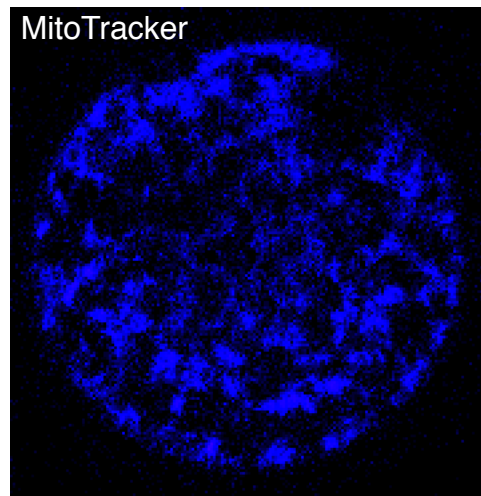**c**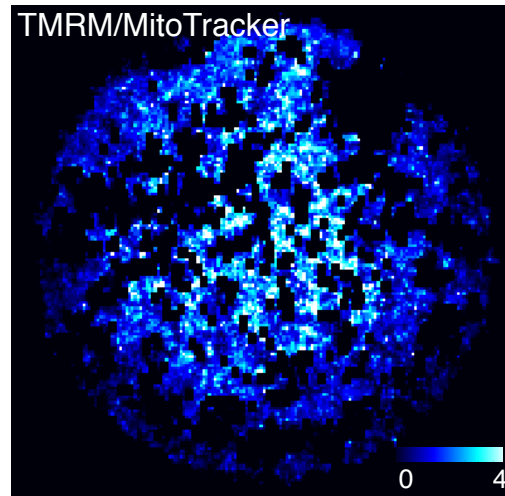**d**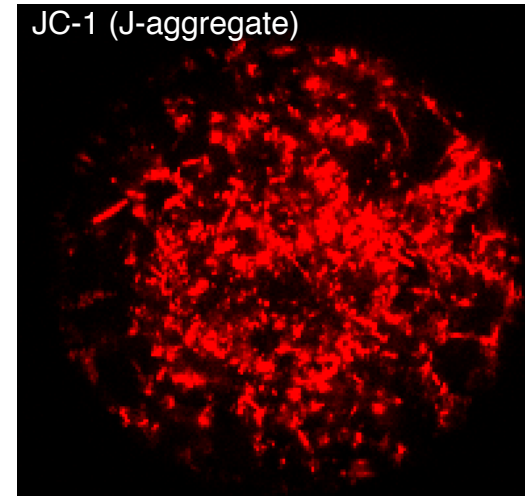**e**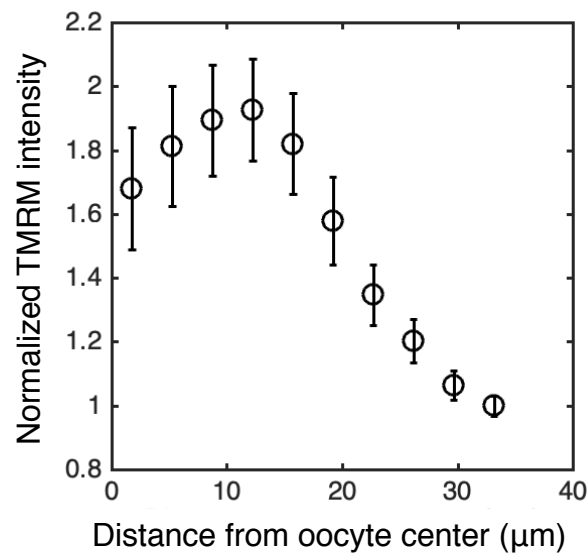**f**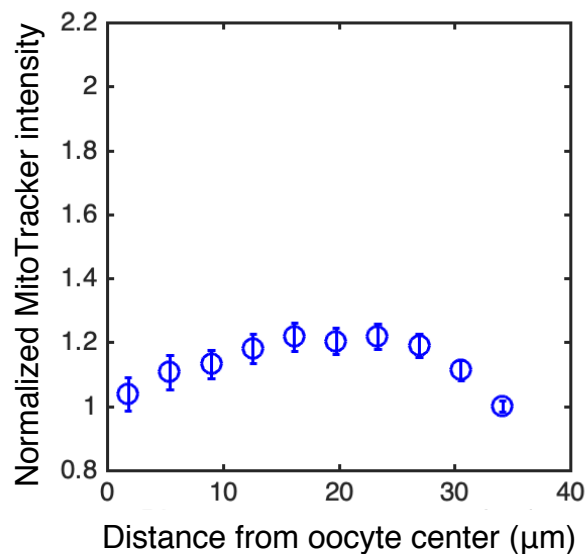**g**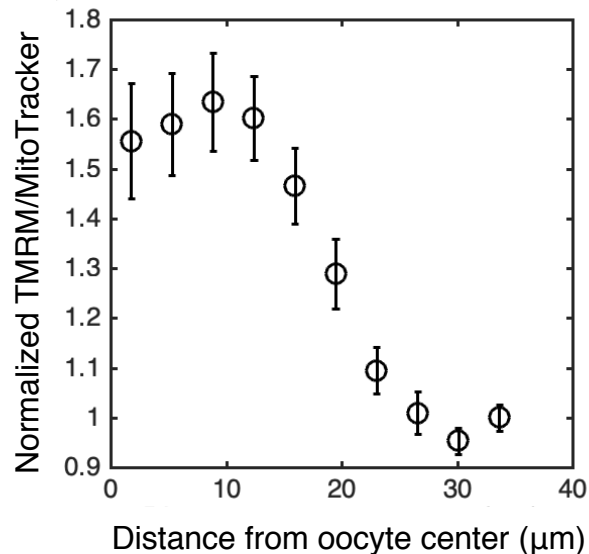**h**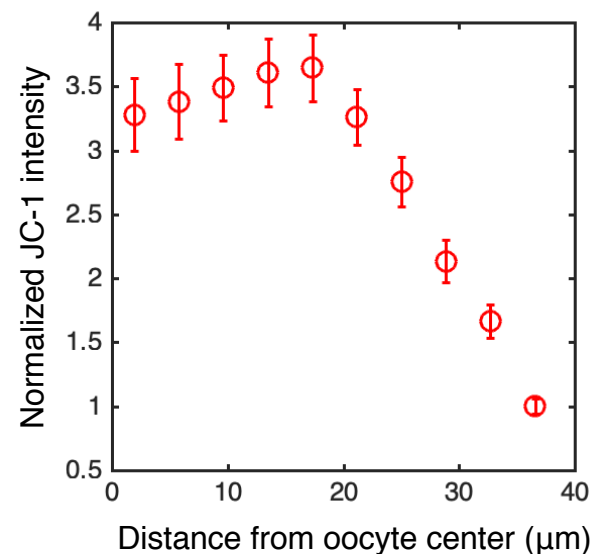

Supplement: supp [file elife-73808-supp-v1.zip]

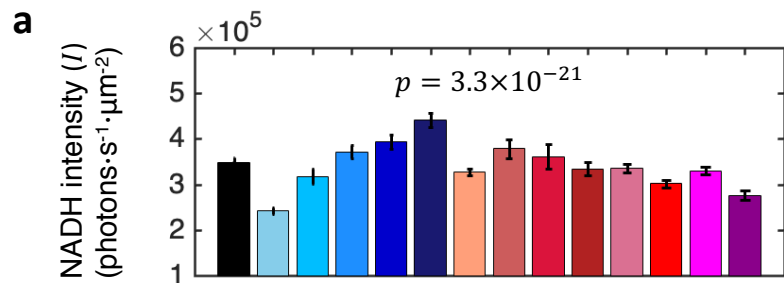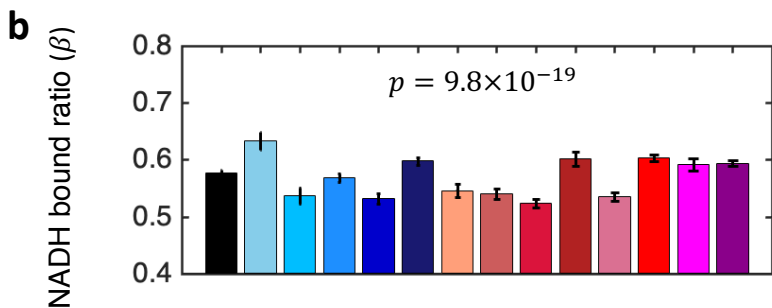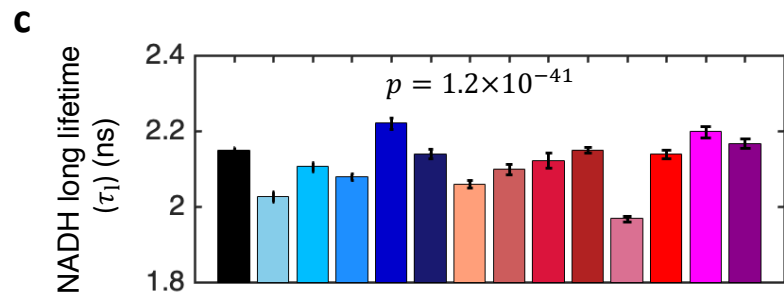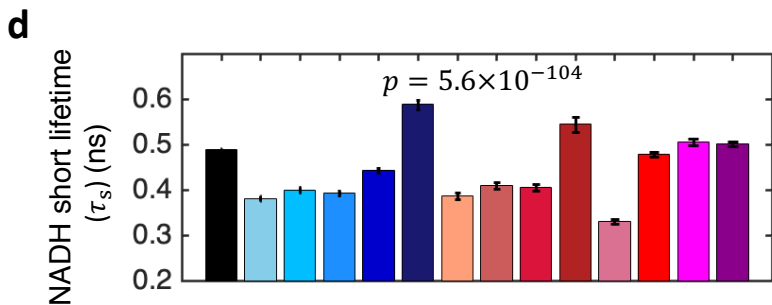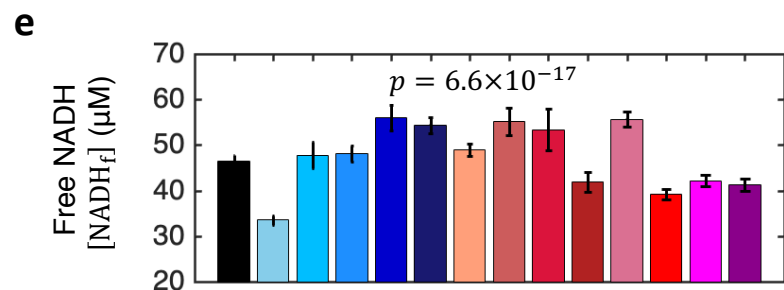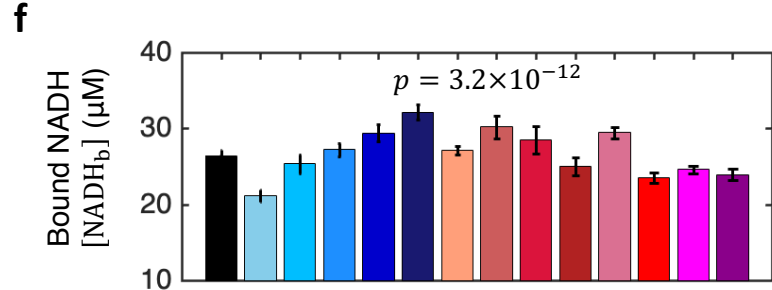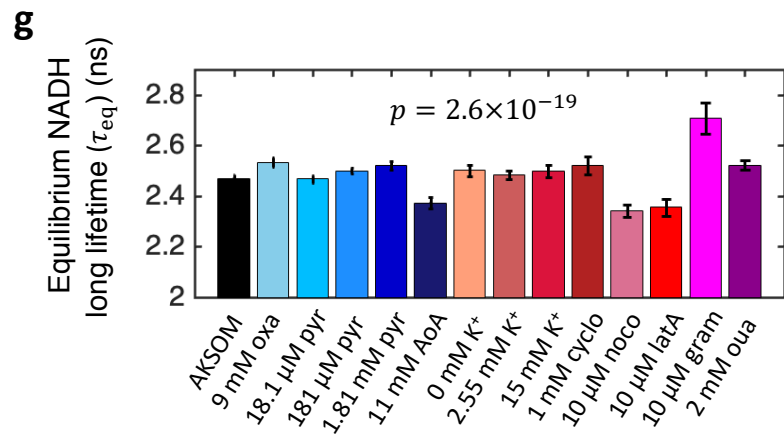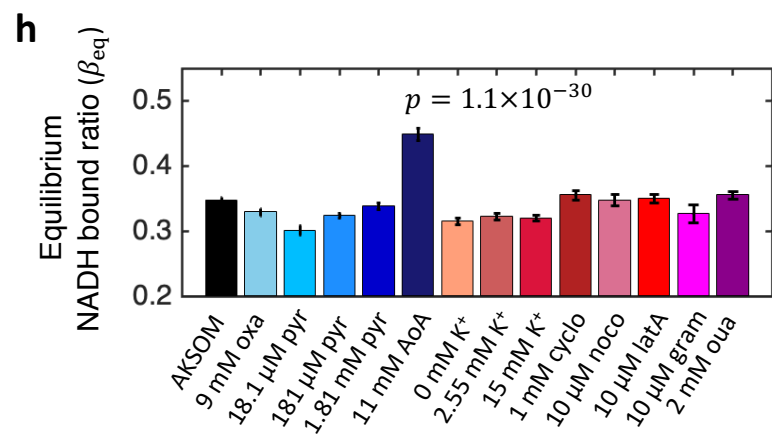

Supplement: supp [file elife-73808-supp-v1.zip]

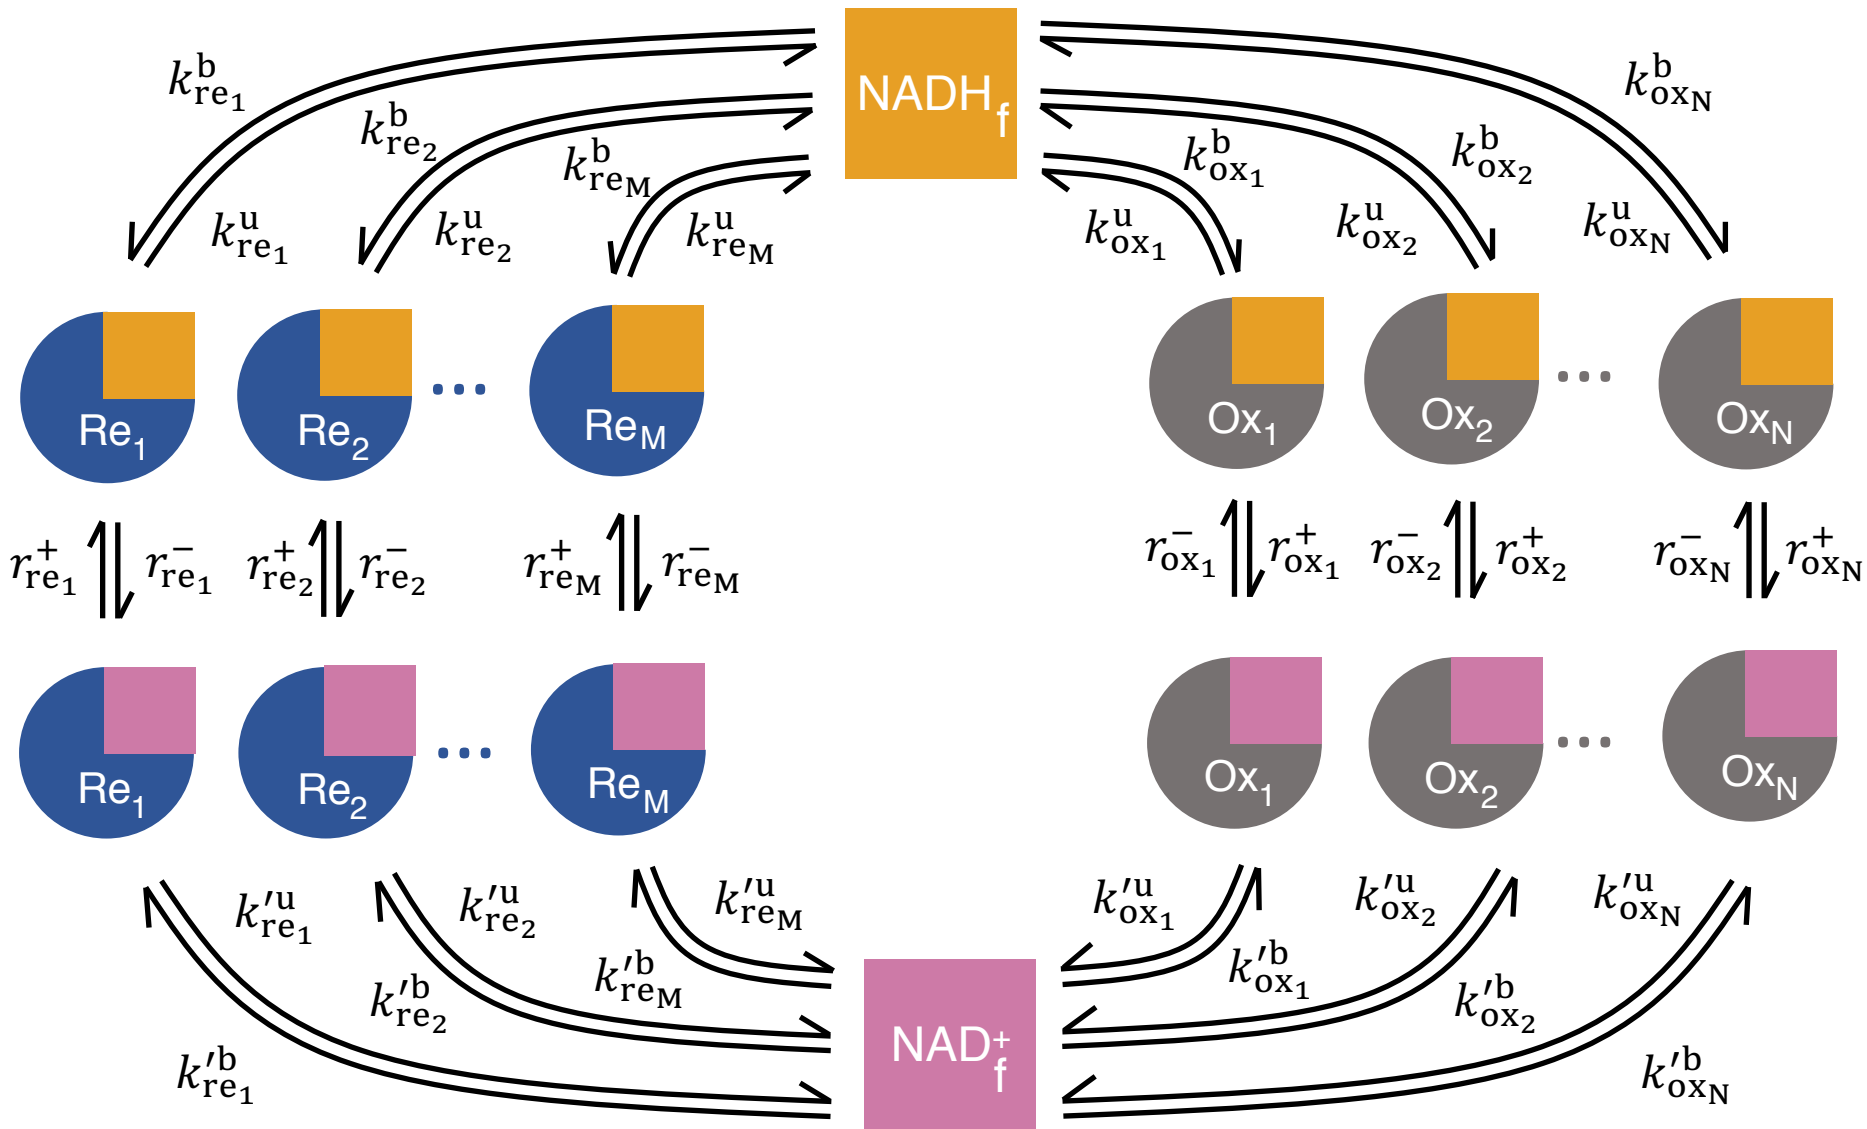

Supplement: supp [file elife-73808-supp-v1.zip]

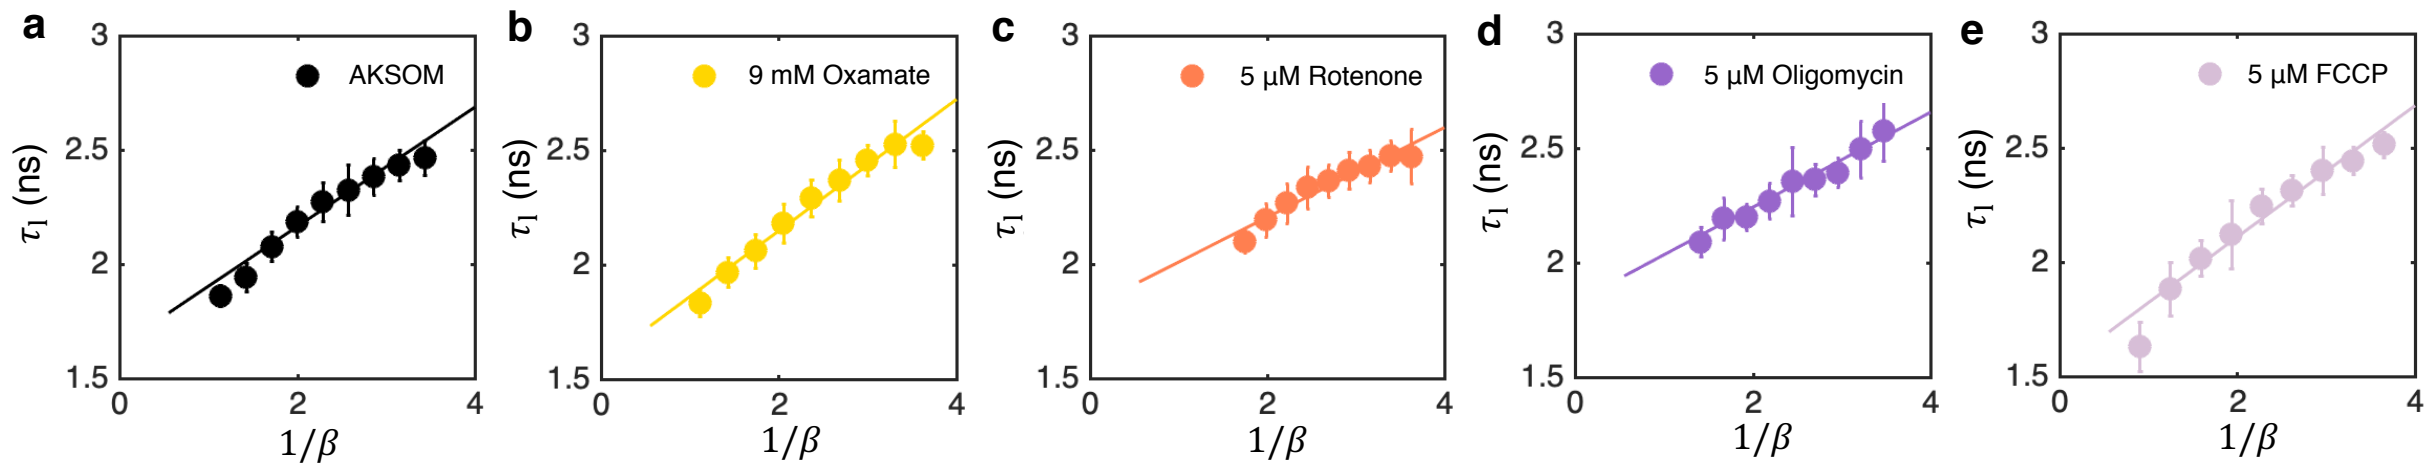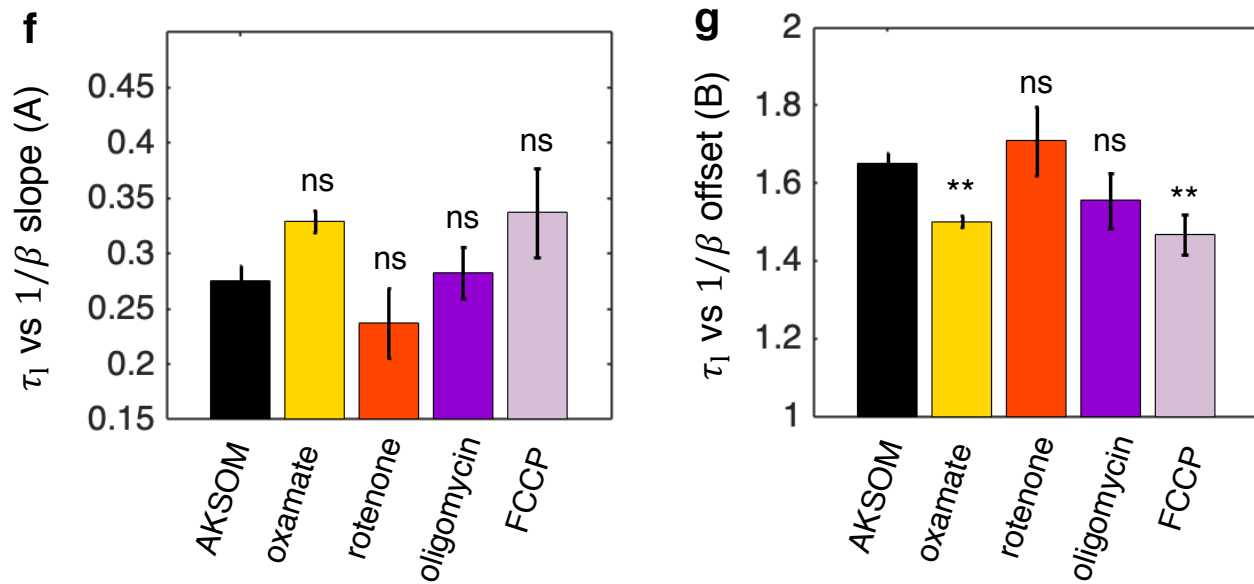

Supplement: supp [file elife-73808-supp-v1.zip]

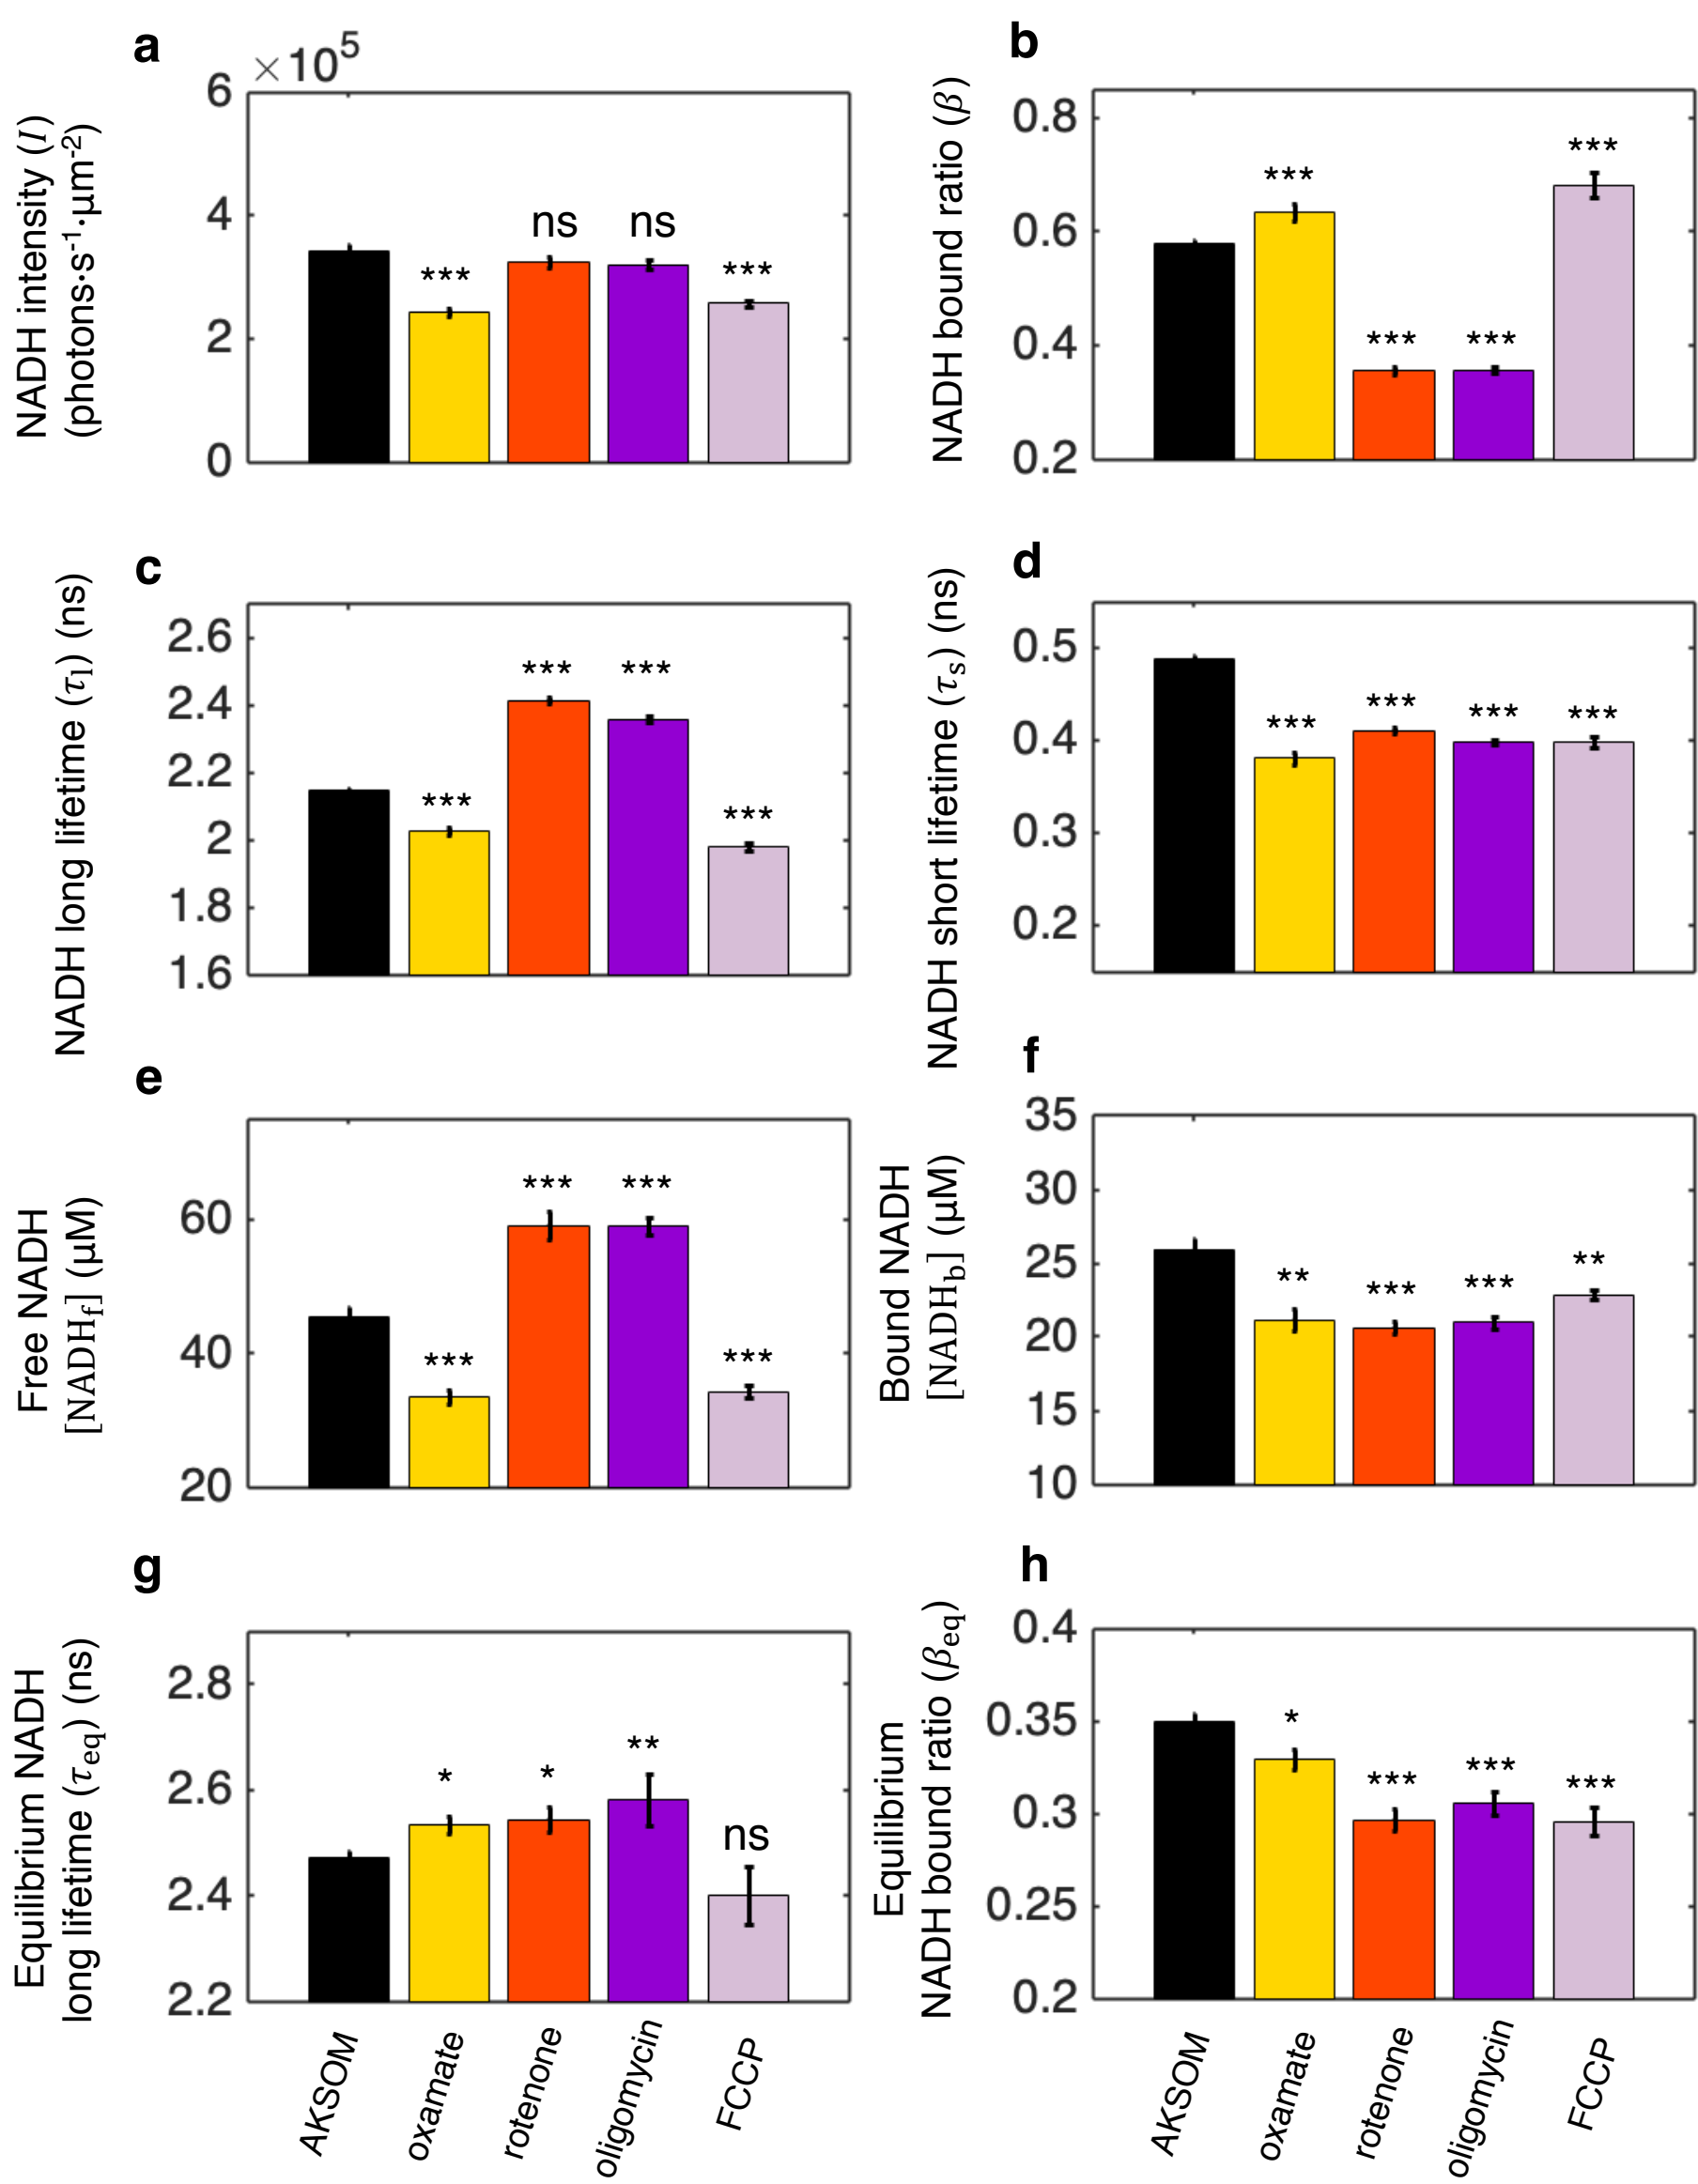

Supplement: supp [file elife-73808-supp-v1.zip]
